# Supplementary material for: Naturally Occurring Mutations of SARS-CoV-2 Main Protease Confer Drug Resistance to Nirmatrelvir
Source: PubMed Central journal article supplement (PMC10451032; doi:10.1021/acscentsci.3c00538), 2023-07-24
Supplement: oc3c00538_si_001.pdf [file oc3c00538_si_001.pdf]

Supplementary Materials for

**Naturally occurring mutations of SARS-CoV-2 main protease confer drug resistance to nirmatrelvir**

Yanmei Hu,<sup>1,†</sup> Eric M. Lewandowski,<sup>2,†</sup> Haozhou Tan,<sup>1,†</sup> Xiaoming Zhang,<sup>3,4</sup> Ryan T. Morgan,<sup>2</sup>  
Xiujun Zhang,<sup>2</sup> Lian M. C. Jacobs,<sup>2</sup> Shane G. Butler,<sup>2</sup> Maura V. Gongora,<sup>2</sup> John Choy,<sup>5</sup> Xufang  
Deng,<sup>3,4,\*</sup> Yu Chen,<sup>2,\*</sup> Jun Wang<sup>1,\*</sup>

<sup>1</sup>Department of Medicinal Chemistry, Ernest Mario School of Pharmacy, Rutgers, the State University of New Jersey, NJ, 08854, United States

<sup>2</sup>Department of Molecular Medicine, Morsani College of Medicine, University of South Florida, Tampa, FL, 33612, United States

<sup>3</sup>Department Physiological Sciences, College of Veterinary Medicine, Oklahoma State University, Stillwater, OK, 74078, United States

<sup>4</sup>Oklahoma Center for Respiratory and Infectious Diseases, Oklahoma State University, Stillwater, OK, 74078, United States

<sup>5</sup>Department Biology, School of Arts and Sciences, the Catholic University of America, Washington DC, 20064, United States

<sup>†</sup>These authors contributed equally to this work.

\*Corresponding authors:

Jun Wang, Tel: 848-445-6488, email: junwang@pharmacy.rutgers.edu

Yu Chen, Tel: 813-974-7809, email: ychen1@usf.edu

Xufang Deng, Tel: 405-744-2158, email: xufang.deng@okstate.edu

This file includes:

Supplementary Materials

**Figure S1.** Sodium dodecyl sulfate-polyacrylamide gel electrophoresis (SDS-PAGE) analysis of purified SARS-CoV-2 M<sup>pro</sup> WT and mutant proteins.

**Figure S2.** Thermal shift assay results of M<sup>pro</sup> mutants.

**Figure S3.** Determination of K<sub>i</sub> values for GC-376, PF-00835231 or Nirmatrelvir (PF-07321332) against SARS-CoV-2 WT and mutant proteins in FRET assay.

**Figure S4.** Plaque formation of passaged recombinant Nsp5 mutants.

**Figure S5.** X-ray crystal structures of H164N mutant.

**Table S1.** Enzymatic characterization, drug inhibition, and PDB code of SARS-CoV-2 M<sup>pro</sup> mutants.

**Table S2.** Thermal shift assay results of nirmatrelvir with M<sup>pro</sup> mutants.

**Table S3.** X-ray Data Collection and Refinement Statistics.

**Table S4.** Protein concentrations used for the K<sub>m</sub>/V<sub>max</sub>, IC<sub>50</sub> and K<sub>i</sub> measurements.

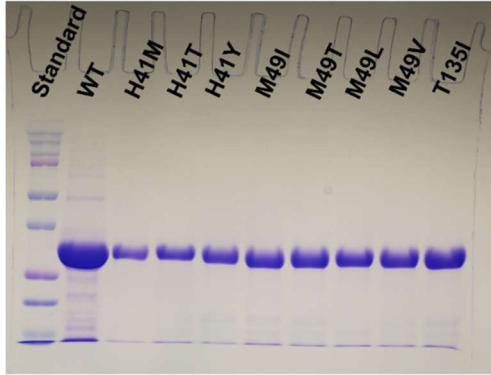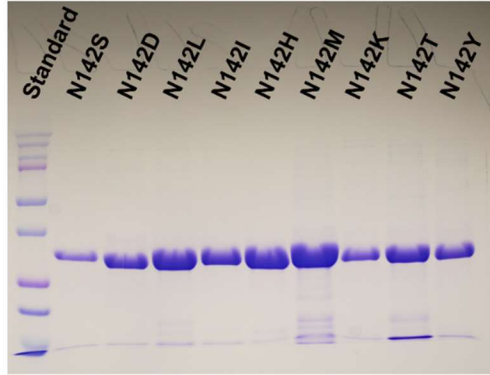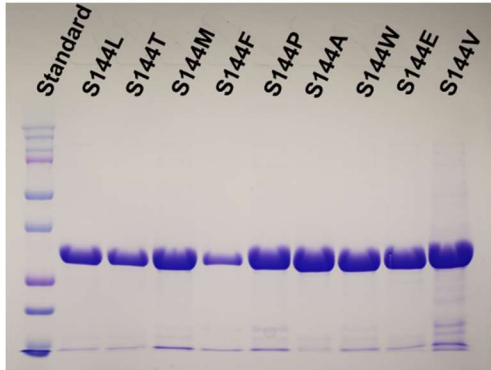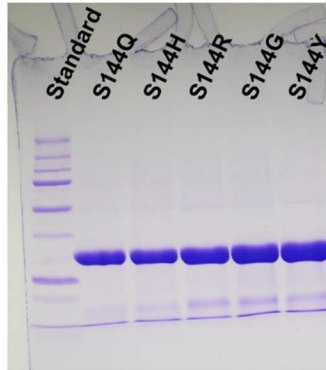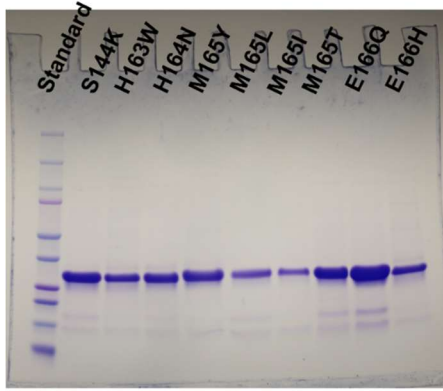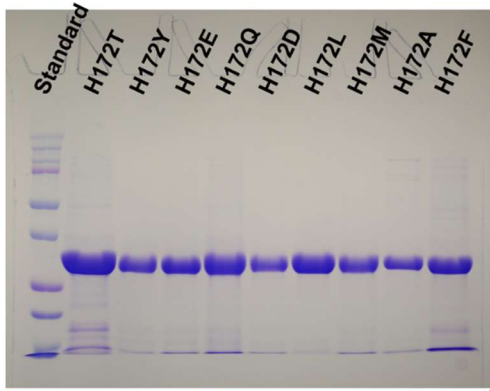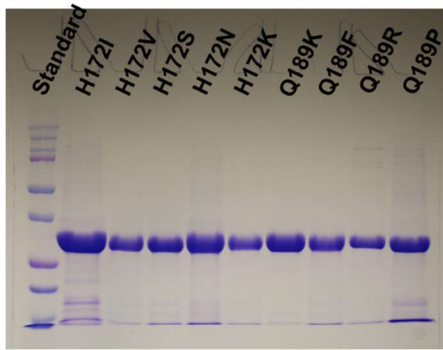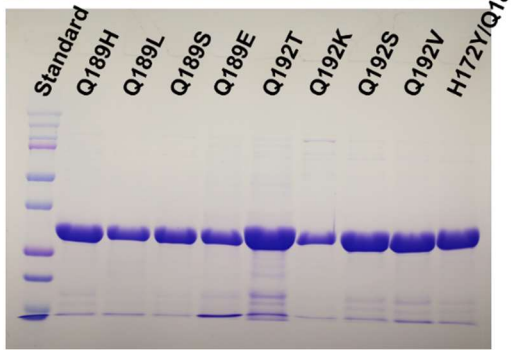

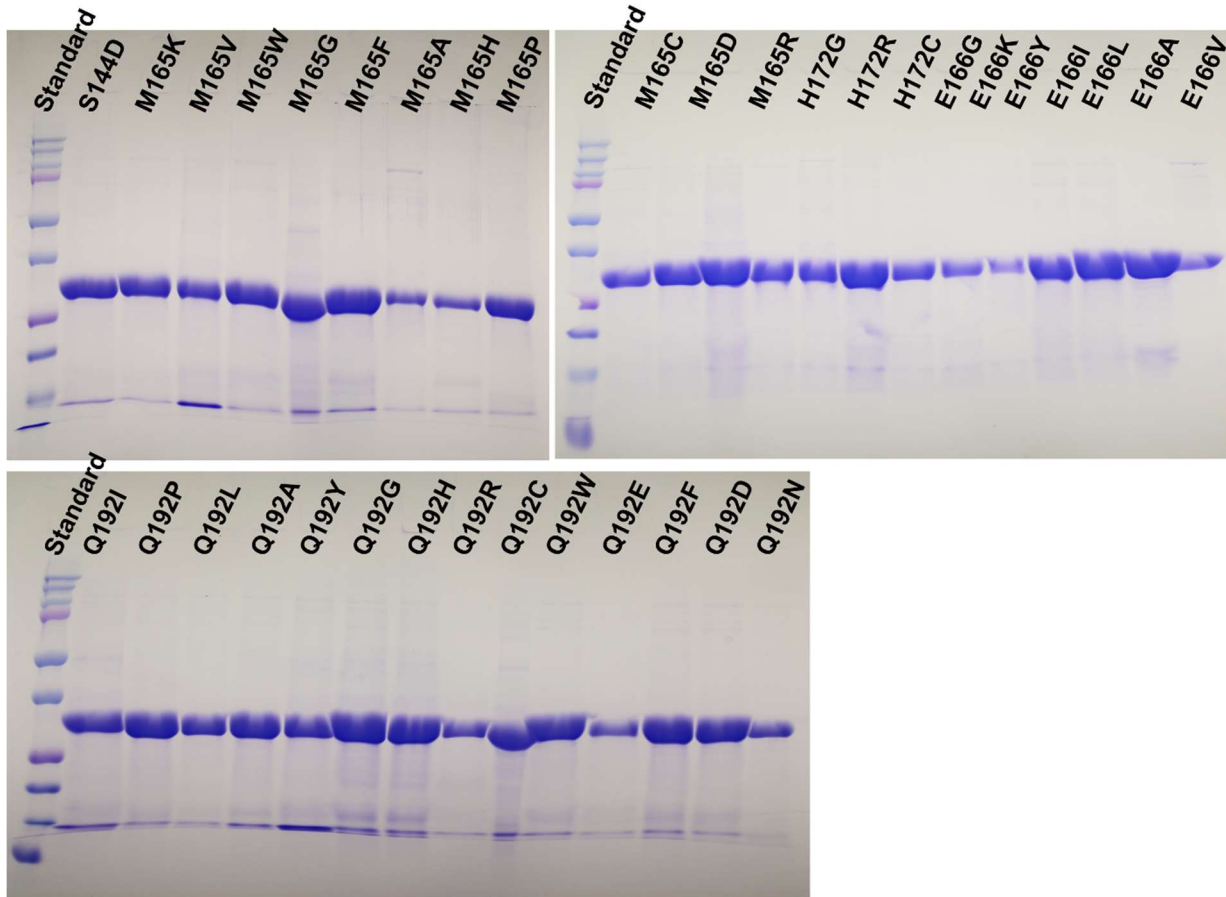

**Figure S1. Sodium dodecyl sulfate-polyacrylamide gel electrophoresis (SDS-PAGE) analysis of purified SARS-CoV-2 M<sup>pro</sup> WT and mutant proteins.** 10  $\mu$ l of purified proteins were analyzed on 15% SDS-PAGE gel and the protein bands were visualized by staining with Coomassie blue. Protein standard (10-250 kD) was purchased from Bio-Rad, Cat #1610374.

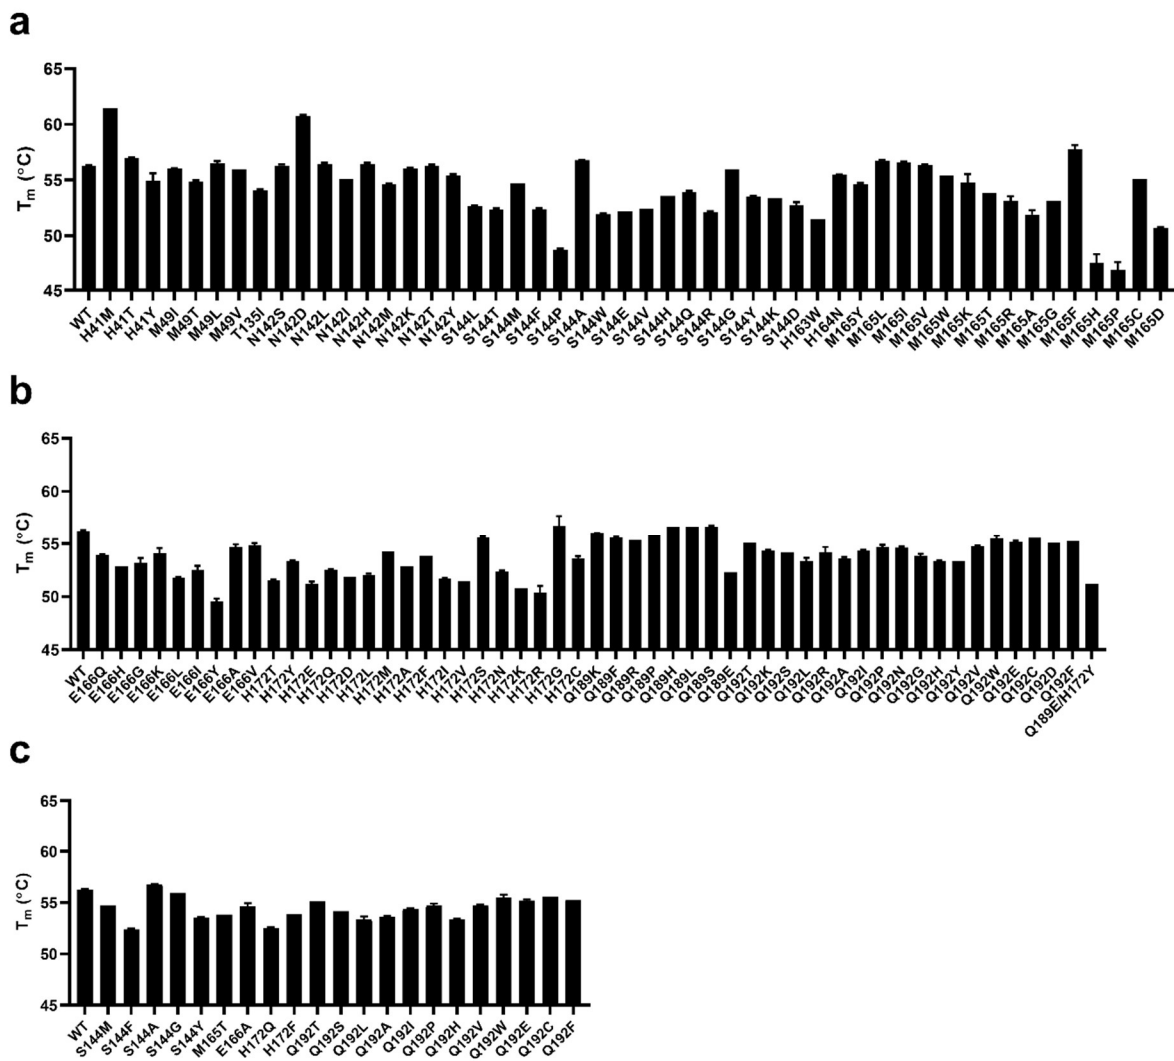

Figure S2. Thermal shift assay results of  $M^{pro}$  mutants.

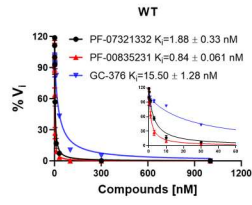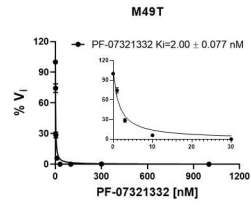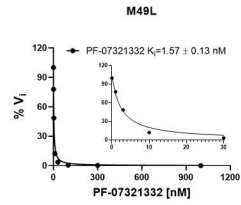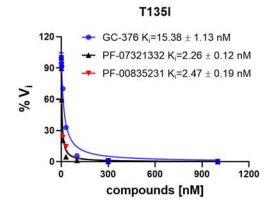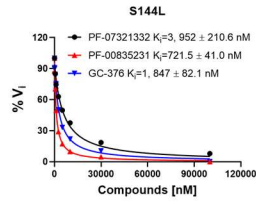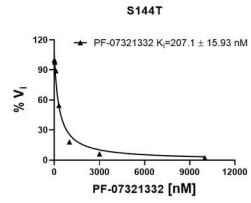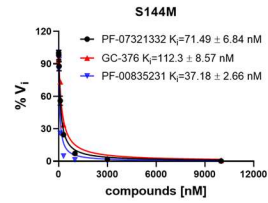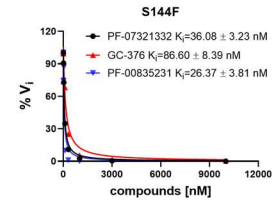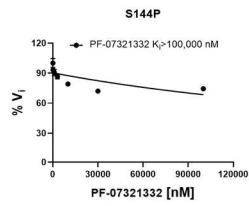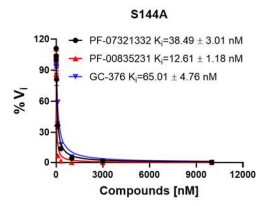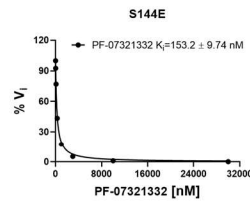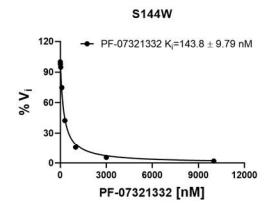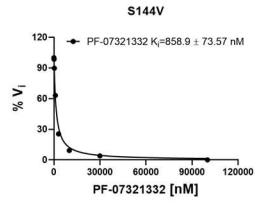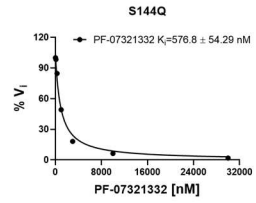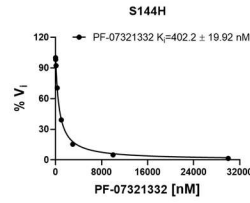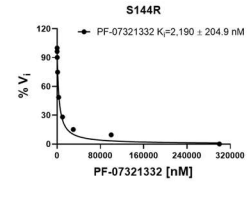

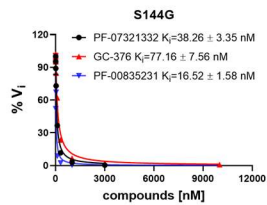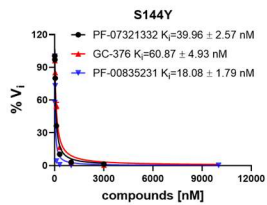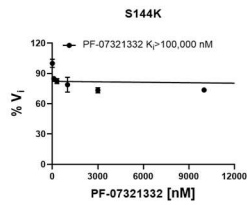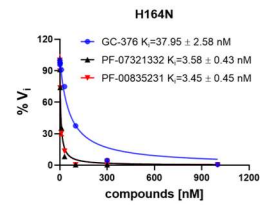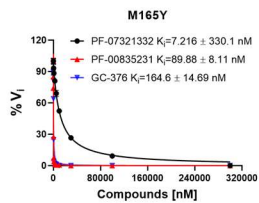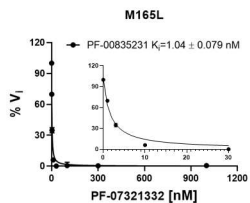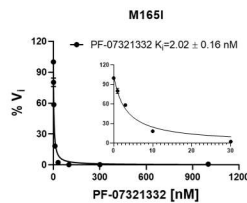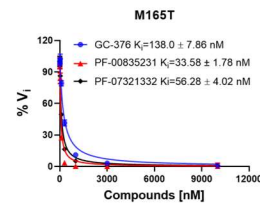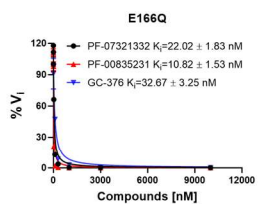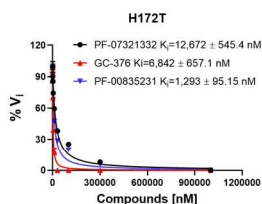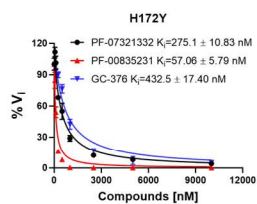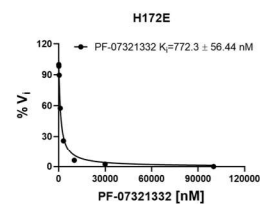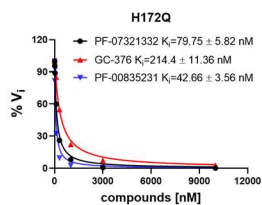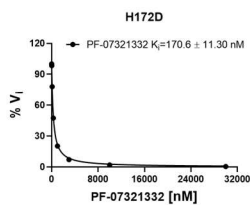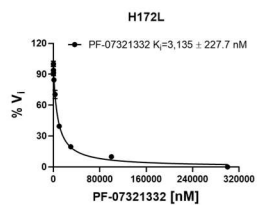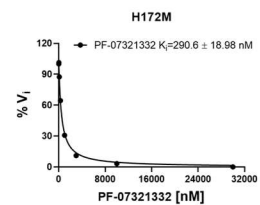

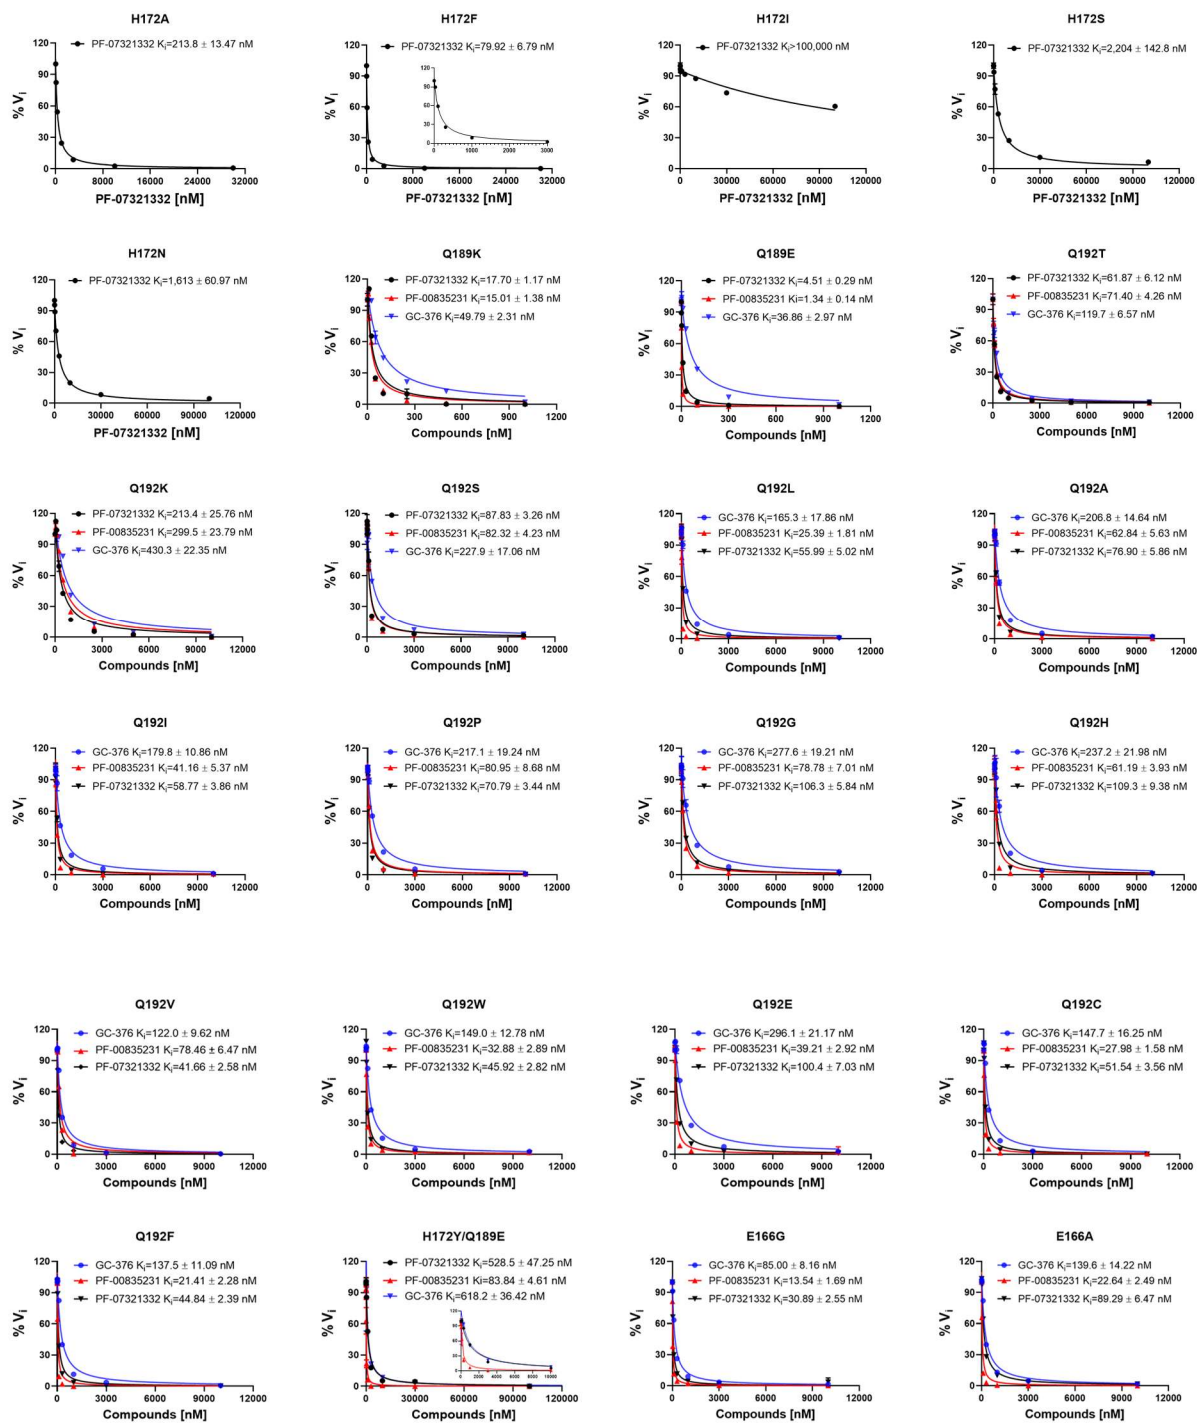

**Figure S3. Determination of  $K_i$  values for GC-376, PF-00835231 or Nirmatrelvir (PF-07321332) against SARS-CoV-2 WT and mutant proteins in FRET assay. Curves were generated by fitting the initial velocity against various concentrations of the**



compounds using Morrison plot (tight binding) in Prism 8 software. The results were the average of duplicates.

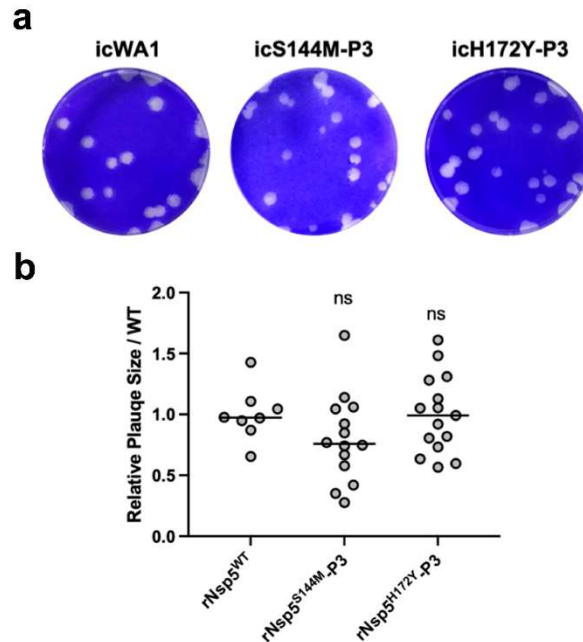

**Figure S4. Plaque formation of passaged recombinant Nsp5 mutants. a** Plaque formation by rNsp5<sup>WT</sup>, rNsp<sup>S144M</sup>-P3, and rNsp5<sup>H172Y</sup>-P3 mutant viruses. **b** Plaque sizes were measured for each virus using ImageJ. Relative plaque sizes over WT are presented as mean ± SEM. Statistical significance of the size differences of each virus vs. rNsp5<sup>WT</sup> virus was determined using the unpaired Kolmogorov-Smirnov test in Prism 9. ns: no significant.

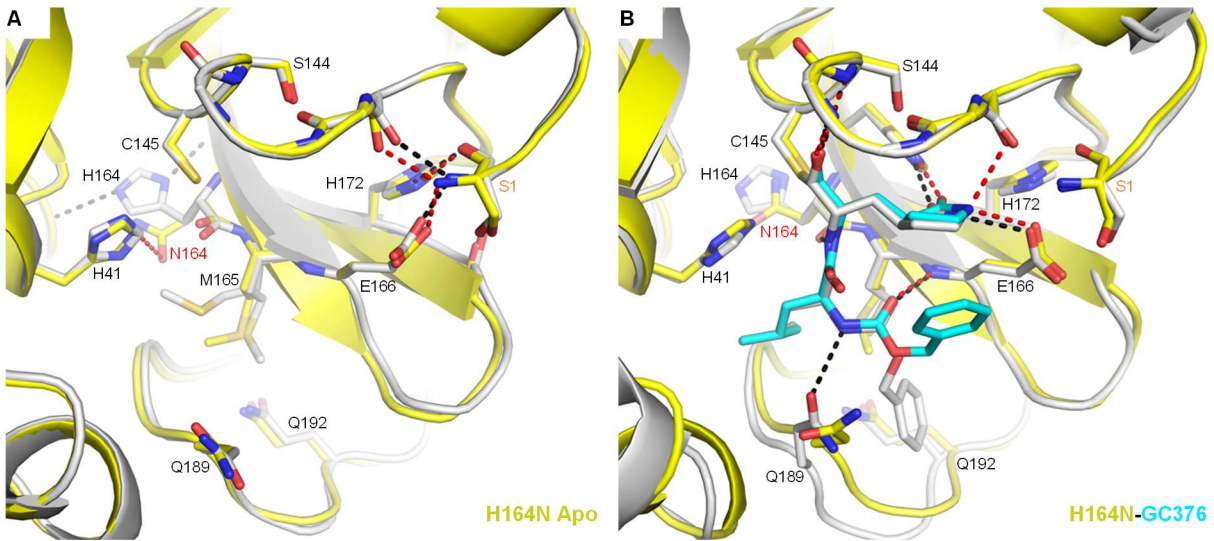

**Figure S5. X-ray crystal structures of H164N mutant.** **a** Apo M<sup>pro</sup> WT (white, PDB 7JP1) aligned with apo M<sup>pro</sup> H164N (yellow, PDB 8DFN). **b** M<sup>pro</sup> WT GC376 complex (white, PDB 6WTT) aligned with M<sup>pro</sup> H164N GC376 complex (yellow, PDB 8DD1). WT hydrogen bonds are shown as black dashes, and mutant hydrogen bonds are shown as red dashes. GC-376 is shown in white for the WT structure and cyan for the mutant structure. Mutation is indicated with red text. Ser1 from an adjacent monomer is indicated with orange text.

**Table S1. Enzymatic characterization, drug inhibition, and PDB code of SARS-CoV-2 M<sup>pro</sup> mutants.**

| Resistant mutants identified from the GISAID SARS-CoV-2 sequence analysis |                         |                                                                                                                                                                          |                                                                                             |                                                                                                   |                                                                                                                      |          |
|---------------------------------------------------------------------------|-------------------------|--------------------------------------------------------------------------------------------------------------------------------------------------------------------------|---------------------------------------------------------------------------------------------|---------------------------------------------------------------------------------------------------|----------------------------------------------------------------------------------------------------------------------|----------|
| M <sup>pro</sup> mutants                                                  | Occurrence <sup>a</sup> | $K_{cat}$ , $V_{max}$ , $K_m$ , $k_{cat}/K_m$                                                                                                                            | 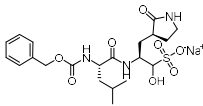<br>GC-376 | <br>PF-00835231 | <br>Nirmatrelvir<br>(PF-07321332) | PDB code |
| WT                                                                        |                         | $K_m = 35.36 \pm 2.41 \mu\text{M}$<br>$V_{max} = 38.97 \pm 0.91 \text{ nM/s}$<br>$k_{cat} = 0.39 \text{ S}^{-1}$<br>$k_{cat}/K_m = 11,000 \text{ S}^{-1}\text{M}^{-1}$   | $\text{IC}_{50} = 40.25 \pm 1.61 \text{ nM}$<br>$K_i = 15.50 \pm 1.28 \text{ nM}$           | $\text{IC}_{50} = 15.09 \pm 0.80 \text{ nM}$<br>$K_i = 0.84 \pm 0.061 \text{ nM}$                 | $\text{IC}_{50} = 26.03 \pm 1.65 \text{ nM}$<br>$K_i = 1.88 \pm 0.33 \text{ nM}$                                     |          |
| H41M                                                                      | 84                      | Enzymatically inactive                                                                                                                                                   |                                                                                             |                                                                                                   |                                                                                                                      |          |
| H41T                                                                      | 27                      | Enzymatically inactive                                                                                                                                                   |                                                                                             |                                                                                                   |                                                                                                                      |          |
| H41Y                                                                      | 19                      | Enzymatically inactive                                                                                                                                                   |                                                                                             |                                                                                                   |                                                                                                                      |          |
| M49I                                                                      | 2,080                   | $K_m = 21.43 \pm 3.29 \mu\text{M}$<br>$V_{max} = 19.90 \pm 0.94 \text{ nM/s}$<br>$k_{cat} = 0.3980 \text{ S}^{-1}$<br>$k_{cat}/K_m = 18,572 \text{ S}^{-1}\text{M}^{-1}$ | $\text{IC}_{50} = 41.55 \pm 0.75 \text{ nM}$                                                | $\text{IC}_{50} = 17.84 \pm 0.64 \text{ nM}$                                                      | $\text{IC}_{50} = 26.54 \pm 1.05 \text{ nM}$                                                                         |          |
| M49T                                                                      | 78                      | $K_m = 21.58 \pm 2.61 \mu\text{M}$<br>$V_{max} = 14.47 \pm 1.08 \text{ nM/s}$<br>$k_{cat} = 0.2315 \text{ S}^{-1}$<br>$k_{cat}/K_m = 10,728 \text{ S}^{-1}\text{M}^{-1}$ |                                                                                             |                                                                                                   | $\text{IC}_{50} = 15.76 \pm 0.69 \text{ nM}$<br>$K_i = 2.00 \pm 0.08 \text{ nM}$                                     |          |
| M49L                                                                      | 73                      | $K_m = 29.02 \pm 2.42 \mu\text{M}$<br>$V_{max} = 34.77 \pm 1.93 \text{ nM/s}$<br>$k_{cat} = 0.5563 \text{ S}^{-1}$<br>$k_{cat}/K_m = 19,170 \text{ S}^{-1}\text{M}^{-1}$ |                                                                                             |                                                                                                   | $\text{IC}_{50} = 18.50 \pm 0.69 \text{ nM}$<br>$K_i = 1.57 \pm 0.13 \text{ nM}$                                     |          |
| M49V                                                                      | 55                      | $K_m = 32.35 \pm 1.65 \mu\text{M}$<br>$V_{max} = 23.75 \pm 0.92 \text{ nM/s}$<br>$k_{cat} = 0.1900 \text{ S}^{-1}$<br>$k_{cat}/K_m = 5,873 \text{ S}^{-1}\text{M}^{-1}$  |                                                                                             |                                                                                                   | $\text{IC}_{50} = 23.48 \pm 0.39 \text{ nM}$                                                                         |          |
| M49 deletion                                                              | 29                      | $K_m = 30.87 \pm 3.16 \mu\text{M}$<br>$V_{max} = 17.45 \pm 0.60 \text{ nM/s}$<br>$k_{cat} = 0.1745 \text{ S}^{-1}$<br>$k_{cat}/K_m = 5,653 \text{ S}^{-1}\text{M}^{-1}$  |                                                                                             |                                                                                                   | $\text{IC}_{50} = 32.99 \pm 1.94 \text{ nM}$<br>$K_i = 8.02 \pm 0.82 \text{ nM}$                                     |          |
| T135I                                                                     | 1,342                   | $K_m = 27.08 \pm 2.76 \mu\text{M}$<br>$V_{max} = 29.28 \pm 0.97 \text{ nM/s}$<br>$k_{cat} = 0.2928 \text{ S}^{-1}$<br>$k_{cat}/K_m = 10,812 \text{ S}^{-1}\text{M}^{-1}$ | $\text{IC}_{50} = 42.12 \pm 3.41 \text{ nM}$<br>$K_i = 15.38 \pm 1.13 \text{ nM}$           | $\text{IC}_{50} = 15.63 \pm 1.05 \text{ nM}$<br>$K_i = 2.47 \pm 0.19 \text{ nM}$                  | $\text{IC}_{50} = 21.86 \pm 0.85 \text{ nM}$<br>$K_i = 2.26 \pm 0.12 \text{ nM}$                                     |          |
| T135 deletion                                                             | 40                      | $K_m = 41.78 \pm 3.99 \mu\text{M}$<br>$V_{max} = 13.94 \pm 0.49 \text{ nM/s}$<br>$k_{cat} = 0.0028 \text{ S}^{-1}$<br>$k_{cat}/K_m = 67 \text{ S}^{-1}\text{M}^{-1}$     |                                                                                             |                                                                                                   |                                                                                                                      |          |

|                |     |                                                                                                                                                                                         |                                                                                   |                                                                                   |                                                                                     |                                 |
|----------------|-----|-----------------------------------------------------------------------------------------------------------------------------------------------------------------------------------------|-----------------------------------------------------------------------------------|-----------------------------------------------------------------------------------|-------------------------------------------------------------------------------------|---------------------------------|
| N142S          | 142 | $K_m = 22.24 \pm 3.09 \mu\text{M}$<br>$V_{\max} = 26.07 \pm 1.13 \text{ nM/s}$<br>$k_{\text{cat}} = 0.2607 \text{ S}^{-1}$<br>$k_{\text{cat}}/K_m = 11,722 \text{ S}^{-1}\text{M}^{-1}$ | $\text{IC}_{50} = 39.92 \pm 1.36 \text{ nM}$                                      | $\text{IC}_{50} = 17.64 \pm 1.18 \text{ nM}$                                      | $\text{IC}_{50} = 25.97 \pm 1.14 \text{ nM}$                                        |                                 |
| N142D          | 76  | $K_m = 29.03 \pm 2.98 \mu\text{M}$<br>$V_{\max} = 9.91 \pm 0.34 \text{ nM/s}$<br>$k_{\text{cat}} = 0.0793 \text{ S}^{-1}$<br>$k_{\text{cat}}/K_m = 2,731 \text{ S}^{-1}\text{M}^{-1}$   | $\text{IC}_{50} = 37.90 \pm 1.67 \text{ nM}$                                      | $\text{IC}_{50} = 18.23 \pm 0.49 \text{ nM}$                                      | $\text{IC}_{50} = 24.30 \pm 1.46 \text{ nM}$                                        |                                 |
| N142L          | 34  | $K_m = 25.93 \pm 2.51 \mu\text{M}$<br>$V_{\max} = 24.94 \pm 1.57 \text{ nM/s}$<br>$k_{\text{cat}} = 0.3990 \text{ S}^{-1}$<br>$k_{\text{cat}}/K_m = 15,389 \text{ S}^{-1}\text{M}^{-1}$ |                                                                                   |                                                                                   | $\text{IC}_{50} = 15.29 \pm 0.42 \text{ nM}$                                        |                                 |
| N142I          | 18  | $K_m = 31.02 \pm 5.85 \mu\text{M}$<br>$V_{\max} = 32.86 \pm 2.10 \text{ nM/s}$<br>$k_{\text{cat}} = 0.5258 \text{ S}^{-1}$<br>$k_{\text{cat}}/K_m = 16,949 \text{ S}^{-1}\text{M}^{-1}$ |                                                                                   |                                                                                   | $\text{IC}_{50} = 17.11 \pm 0.82 \text{ nM}$                                        |                                 |
| N142H          | 13  | $K_m = 41.81 \pm 5.14 \mu\text{M}$<br>$V_{\max} = 29.84 \pm 1.35 \text{ nM/s}$<br>$k_{\text{cat}} = 0.2387 \text{ S}^{-1}$<br>$k_{\text{cat}}/K_m = 5,710 \text{ S}^{-1}\text{M}^{-1}$  |                                                                                   |                                                                                   | $\text{IC}_{50} = 19.65 \pm 0.32 \text{ nM}$                                        |                                 |
| N142M          | 9   | $K_m = 10.02 \pm 3.40 \mu\text{M}$<br>$V_{\max} = 10.88 \pm 0.96 \text{ nM/s}$<br>$k_{\text{cat}} = 0.1741 \text{ S}^{-1}$<br>$k_{\text{cat}}/K_m = 17,373 \text{ S}^{-1}\text{M}^{-1}$ |                                                                                   |                                                                                   | $\text{IC}_{50} = 19.01 \pm 0.62 \text{ nM}$                                        |                                 |
| N142K          | 8   | $K_m = 43.57 \pm 4.72 \mu\text{M}$<br>$V_{\max} = 20.14 \pm 0.81 \text{ nM/s}$<br>$k_{\text{cat}} = 0.3222 \text{ S}^{-1}$<br>$k_{\text{cat}}/K_m = 7,396 \text{ S}^{-1}\text{M}^{-1}$  |                                                                                   |                                                                                   | $\text{IC}_{50} = 13.93 \pm 0.39 \text{ nM}$                                        |                                 |
| N142T          | 4   | $K_m = 21.99 \pm 4.78 \mu\text{M}$<br>$V_{\max} = 13.66 \pm 0.92 \text{ nM/s}$<br>$k_{\text{cat}} = 0.2186 \text{ S}^{-1}$<br>$k_{\text{cat}}/K_m = 9,939 \text{ S}^{-1}\text{M}^{-1}$  |                                                                                   |                                                                                   | $\text{IC}_{50} = 18.73 \pm 0.96 \text{ nM}$                                        |                                 |
| N142Y          | 4   | $K_m = 20.84 \pm 2.45 \mu\text{M}$<br>$V_{\max} = 11.95 \pm 0.86 \text{ nM/s}$<br>$k_{\text{cat}} = 0.1912 \text{ S}^{-1}$<br>$k_{\text{cat}}/K_m = 9,175 \text{ S}^{-1}\text{M}^{-1}$  |                                                                                   |                                                                                   | $\text{IC}_{50} = 14.90 \pm 1.26 \text{ nM}$                                        |                                 |
| N142 deletion  | 91  | $K_m = 31.35 \pm 3.46 \mu\text{M}$<br>$V_{\max} = 10.86 \pm 0.032 \text{ nM/s}$<br>$k_{\text{cat}} = 0.002172 \text{ S}^{-1}$<br>$k_{\text{cat}}/K_m = 69 \text{ S}^{-1}\text{M}^{-1}$  |                                                                                   |                                                                                   |                                                                                     |                                 |
| S144L          | 52  | $K_m = 51.29 \pm 3.20 \mu\text{M}$<br>$V_{\max} = 6.11 \pm 0.15 \text{ nM/s}$<br>$k_{\text{cat}} = 0.0031 \text{ S}^{-1}$<br>$k_{\text{cat}}/K_m = 60 \text{ S}^{-1}\text{M}^{-1}$      | $\text{IC}_{50} = 1,812 \pm 86.1 \text{ nM}$<br>$K_i = 1,847 \pm 82.1 \text{ nM}$ | $\text{IC}_{50} = 716.7 \pm 42.5 \text{ nM}$<br>$K_i = 721.5 \pm 41.0 \text{ nM}$ | $\text{IC}_{50} = 5,364 \pm 498.6 \text{ nM}$<br>$K_i = 3,952 \pm 210.6 \text{ nM}$ | Apo:<br>8DFE<br>GC-376:<br>8DD9 |
| S144T          | 17  | $K_m = 44.31 \pm 2.92 \mu\text{M}$<br>$V_{\max} = 16.85 \pm 0.42 \text{ nM/s}$<br>$k_{\text{cat}} = 0.0225 \text{ S}^{-1}$<br>$k_{\text{cat}}/K_m = 507 \text{ S}^{-1}\text{M}^{-1}$    |                                                                                   |                                                                                   | $\text{IC}_{50} = 353.7 \pm 14.36 \text{ nM}$<br>$K_i = 207.1 \pm 15.93 \text{ nM}$ |                                 |
| S144M          | 16  | $K_m = 51.85 \pm 3.37 \mu\text{M}$<br>$V_{\max} = 28.36 \pm 0.72 \text{ nM/s}$<br>$k_{\text{cat}} = 0.0709 \text{ S}^{-1}$<br>$k_{\text{cat}}/K_m = 1,367 \text{ S}^{-1}\text{M}^{-1}$  | $K_i = 112.3 \pm 8.57 \text{ nM}$                                                 | $K_i = 37.18 \pm 2.66 \text{ nM}$                                                 | $\text{IC}_{50} = 175.2 \pm 9.72 \text{ nM}$<br>$K_i = 79.26 \pm 4.13 \text{ nM}$   |                                 |
| L50F/<br>S144M |     | $K_m = 88.44 \pm 8.41 \mu\text{M}$<br>$V_{\max} = 15.32 \pm 0.68 \text{ nM/s}$<br>$k_{\text{cat}} = 0.10 \text{ S}^{-1}$<br>$k_{\text{cat}}/K_m = 1,155 \text{ S}^{-1}\text{M}^{-1}$    | $\text{IC}_{50} = 127.6 \pm 19.6 \text{ nM}$                                      | $\text{IC}_{50} = 52.3 \pm 7.7 \text{ nM}$                                        | $\text{IC}_{50} = 147.4 \pm 21.9 \text{ nM}$<br>$K_i = 33.84 \pm 2.30 \text{ nM}$   |                                 |

|               |    |                                                                                                                                                                                     |                                                                               |                                                                                   |                                                                                     |                                 |
|---------------|----|-------------------------------------------------------------------------------------------------------------------------------------------------------------------------------------|-------------------------------------------------------------------------------|-----------------------------------------------------------------------------------|-------------------------------------------------------------------------------------|---------------------------------|
| S144F         | 15 | $K_m = 45.11 \pm 3.45 \mu\text{M}$<br>$V_{\max} = 21.22 \pm 0.61$<br>nM/s<br>$k_{\text{cat}} = 0.0849 \text{ S}^{-1}$<br>$k_{\text{cat}}/K_m = 1,882 \text{ S}^{-1}\text{M}^{-1}$   | $K_i = 86.60 \pm 8.39 \text{ nM}$                                             | $K_i = 26.37 \pm 3.81 \text{ nM}$                                                 | $\text{IC}_{50} = 133.3 \pm 5.61 \text{ nM}$<br>$K_i = 47.23 \pm 2.24 \text{ nM}$   |                                 |
| S144P         | 12 | $K_m = 2.78 \pm 0.58 \mu\text{M}$<br>$V_{\max} = 0.58 \pm 0.024$<br>nM/s<br>$k_{\text{cat}} = 0.000058 \text{ S}^{-1}$<br>$k_{\text{cat}}/K_m = 21 \text{ S}^{-1}\text{M}^{-1}$     |                                                                               |                                                                                   | $\text{IC}_{50} > 10 \mu\text{M}$<br>$K_i > 10 \mu\text{M}$                         |                                 |
| S144A         | 9  | $K_m = 25.66 \pm 1.76 \mu\text{M}$<br>$V_{\max} = 38.95 \pm 1.12$<br>nM/s<br>$k_{\text{cat}} = 0.1558 \text{ S}^{-1}$<br>$k_{\text{cat}}/K_m = 6,072 \text{ S}^{-1}\text{M}^{-1}$   | $\text{IC}_{50} = 139.80 \pm 9.29$<br>nM<br>$K_i = 65.01 \pm 4.76 \text{ nM}$ | $\text{IC}_{50} = 39.43 \pm 1.14 \text{ nM}$<br>$K_i = 12.61 \pm 1.18 \text{ nM}$ | $\text{IC}_{50} = 171.1 \pm 5.33 \text{ nM}$<br>$K_i = 36.43 \pm 4.11 \text{ nM}$   | Apo:<br>8D4L<br>GC-376:<br>8D4M |
| S144W         | 7  | $K_m = 56.59 \pm 3.01 \mu\text{M}$<br>$V_{\max} = 15.55 \pm 0.39$<br>nM/s<br>$k_{\text{cat}} = 0.0311 \text{ S}^{-1}$<br>$k_{\text{cat}}/K_m = 550 \text{ S}^{-1}\text{M}^{-1}$     |                                                                               |                                                                                   | $\text{IC}_{50} = 289.60 \pm 14.78$<br>nM<br>$K_i = 143.80 \pm 9.79 \text{ nM}$     |                                 |
| S144E         | 6  | $K_m = 52.69 \pm 3.94 \mu\text{M}$<br>$V_{\max} = 23.31 \pm 0.69$<br>nM/s<br>$k_{\text{cat}} = 0.0233 \text{ S}^{-1}$<br>$k_{\text{cat}}/K_m = 442 \text{ S}^{-1}\text{M}^{-1}$     |                                                                               |                                                                                   | $\text{IC}_{50} = 423.40 \pm 29.31$<br>nM<br>$K_i = 153.20 \pm 9.74 \text{ nM}$     |                                 |
| S144V         | 4  | $K_m = 54.43 \pm 3.58 \mu\text{M}$<br>$V_{\max} = 17.12 \pm 0.45$<br>nM/s<br>$k_{\text{cat}} = 0.0086 \text{ S}^{-1}$<br>$k_{\text{cat}}/K_m = 157 \text{ S}^{-1}\text{M}^{-1}$     |                                                                               |                                                                                   | $\text{IC}_{50} = 1,442 \pm 127.2 \text{ nM}$<br>$K_i = 858.9 \pm 73.57 \text{ nM}$ |                                 |
| S144H         | 5  | $K_m = 60.72 \pm 4.26 \mu\text{M}$<br>$V_{\max} = 16.45 \pm 0.48$<br>nM/s<br>$k_{\text{cat}} = 0.0329 \text{ S}^{-1}$<br>$k_{\text{cat}}/K_m = 542 \text{ S}^{-1}\text{M}^{-1}$     |                                                                               |                                                                                   | $\text{IC}_{50} = 650.5 \pm 45.5 \text{ nM}$<br>$K_i = 402.2 \pm 19.92 \text{ nM}$  |                                 |
| S144Q         | 3  | $K_m = 64.17 \pm 4.49 \mu\text{M}$<br>$V_{\max} = 22.19 \pm 0.65$<br>nM/s<br>$k_{\text{cat}} = 0.0222 \text{ S}^{-1}$<br>$k_{\text{cat}}/K_m = 346 \text{ S}^{-1}\text{M}^{-1}$     |                                                                               |                                                                                   | $\text{IC}_{50} = 831.2 \pm 48.6 \text{ nM}$<br>$K_i = 576.8 \pm 54.29 \text{ nM}$  |                                 |
| S144R         | 2  | $K_m = 62.54 \pm 5.09 \mu\text{M}$<br>$V_{\max} = 11.57 \pm 0.39$<br>nM/s<br>$k_{\text{cat}} = 0.0014 \text{ S}^{-1}$<br>$k_{\text{cat}}/K_m = 23 \text{ S}^{-1}\text{M}^{-1}$      |                                                                               |                                                                                   | $\text{IC}_{50} = 6,134 \pm 704.8 \text{ nM}$<br>$K_i = 2,190 \pm 204.9 \text{ nM}$ |                                 |
| S144G         | 2  | $K_m = 53.52 \pm 4.72 \mu\text{M}$<br>$V_{\max} = 27.78 \pm 0.97$<br>nM/s<br>$k_{\text{cat}} = 0.2222 \text{ S}^{-1}$<br>$k_{\text{cat}}/K_m = 4,152 \text{ S}^{-1}\text{M}^{-1}$   | $K_i = 77.16 \pm 7.56 \text{ nM}$                                             | $K_i = 16.52 \pm 1.58 \text{ nM}$                                                 | $\text{IC}_{50} = 96.55 \pm 1.93 \text{ nM}$<br>$K_i = 27.98 \pm 2.76 \text{ nM}$   |                                 |
| S144Y         | 2  | $K_m = 55.15 \pm 4.39 \mu\text{M}$<br>$V_{\max} = 19.44 \pm 0.62$<br>nM/s<br>$k_{\text{cat}} = 0.0778 \text{ S}^{-1}$<br>$k_{\text{cat}}/K_m = 1,410 \text{ S}^{-1}\text{M}^{-1}$   | $K_i = 60.87 \pm 4.93 \text{ nM}$                                             | $K_i = 18.08 \pm 1.79 \text{ nM}$                                                 | $\text{IC}_{50} = 61.49 \pm 3.18 \text{ nM}$<br>$K_i = 34.09 \pm 3.67 \text{ nM}$   |                                 |
| S144K         | 2  | $K_m = 3.88 \pm 0.31 \mu\text{M}$<br>$V_{\max} = 0.80 \pm 0.041$<br>nM/s<br>$k_{\text{cat}} = 0.00008 \text{ S}^{-1}$<br>$k_{\text{cat}}/K_m = 21 \text{ S}^{-1}\text{M}^{-1}$      |                                                                               |                                                                                   | $\text{IC}_{50} > 10 \mu\text{M}$<br>$K_i > 10 \mu\text{M}$                         |                                 |
| S144D         | 1  | $K_m = 27.60 \pm 2.62 \mu\text{M}$<br>$V_{\max} = 5.91 \pm 0.18 \text{ nM/s}$<br>$k_{\text{cat}} = 0.0035 \text{ S}^{-1}$<br>$k_{\text{cat}}/K_m = 128 \text{ S}^{-1}\text{M}^{-1}$ |                                                                               |                                                                                   | $\text{IC}_{50} = 8,532 \pm 99.83 \text{ nM}$                                       |                                 |
| S144 deletion | 84 | $K_m = 32.86 \pm 1.76 \mu\text{M}$<br>$V_{\max} = 10.74 \pm 0.013$<br>nM/s<br>$k_{\text{cat}} = 0.0011 \text{ S}^{-1}$<br>$k_{\text{cat}}/K_m = 33 \text{ S}^{-1}\text{M}^{-1}$     |                                                                               |                                                                                   |                                                                                     |                                 |

|               |       |                                                                                                                                                                                               |                                                                                    |                                                                                    |                                                                                      |                                 |
|---------------|-------|-----------------------------------------------------------------------------------------------------------------------------------------------------------------------------------------------|------------------------------------------------------------------------------------|------------------------------------------------------------------------------------|--------------------------------------------------------------------------------------|---------------------------------|
| H163W         | 4,673 | Enzymatically inactive                                                                                                                                                                        |                                                                                    |                                                                                    |                                                                                      |                                 |
| H164N         | 4,682 | $K_m = 30.72 \pm 2.17 \mu\text{M}$<br>$V_{\text{max}} = 19.88 \pm 0.69 \text{ nM/s}$<br>$k_{\text{cat}} = 0.0795 \text{ S}^{-1}$<br>$k_{\text{cat}}/K_m = 2,588 \text{ S}^{-1}\text{M}^{-1}$  | $\text{IC}_{50} = 126.3 \pm 6.53 \text{ nM}$<br>$K_i = 37.95 \pm 2.58 \text{ nM}$  | $\text{IC}_{50} = 16.39 \pm 0.92 \text{ nM}$<br>$K_i = 3.45 \pm 0.45 \text{ nM}$   | $\text{IC}_{50} = 32.85 \pm 1.92 \text{ nM}$<br>$K_i = 3.58 \pm 0.43 \text{ nM}$     | Apo:<br>8DFN<br>GC-376:<br>8DD1 |
| H164 deletion |       | $K_m = 36.98 \pm 4.14 \mu\text{M}$<br>$V_{\text{max}} = 11.46 \pm 0.17 \text{ nM/s}$<br>$k_{\text{cat}} = 0.0011 \text{ S}^{-1}$<br>$k_{\text{cat}}/K_m = 31 \text{ S}^{-1}\text{M}^{-1}$     |                                                                                    |                                                                                    |                                                                                      |                                 |
| M165Y         | 4,678 | $K_m = 38.42 \pm 2.32 \mu\text{M}$<br>$V_{\text{max}} = 20.26 \pm 0.88 \text{ nM/s}$<br>$k_{\text{cat}} = 0.0101 \text{ S}^{-1}$<br>$k_{\text{cat}}/K_m = 264 \text{ S}^{-1}\text{M}^{-1}$    | $\text{IC}_{50} = 423.0 \pm 22.3 \text{ nM}$<br>$K_i = 164.6 \pm 14.69 \text{ nM}$ | $\text{IC}_{50} = 286.2 \pm 15.99 \text{ nM}$<br>$K_i = 89.88 \pm 8.11 \text{ nM}$ | $\text{IC}_{50} = 10,462 \pm 497.7 \text{ nM}$<br>$K_i = 7,216 \pm 330.1 \text{ nM}$ | Nirmatrelvir<br>8DCZ            |
| M165L         | 280   | $K_m = 20.60 \pm 4.24 \mu\text{M}$<br>$V_{\text{max}} = 17.54 \pm 1.10 \text{ nM/s}$<br>$k_{\text{cat}} = 0.2806 \text{ S}^{-1}$<br>$k_{\text{cat}}/K_m = 13,623 \text{ S}^{-1}\text{M}^{-1}$ |                                                                                    |                                                                                    | $\text{IC}_{50} = 22.62 \pm 0.77 \text{ nM}$<br>$K_i = 1.04 \pm 0.079 \text{ nM}$    |                                 |
| M165I         | 101   | $K_m = 29.45 \pm 4.87 \mu\text{M}$<br>$V_{\text{max}} = 14.90 \pm 0.82 \text{ nM/s}$<br>$k_{\text{cat}} = 0.2384 \text{ S}^{-1}$<br>$k_{\text{cat}}/K_m = 8,095 \text{ S}^{-1}\text{M}^{-1}$  |                                                                                    |                                                                                    | $\text{IC}_{50} = 27.38 \pm 2.09 \text{ nM}$<br>$K_i = 2.02 \pm 0.16 \text{ nM}$     |                                 |
| M165V         | 16    | $K_m = 36.18 \pm 2.61 \mu\text{M}$<br>$V_{\text{max}} = 33.75 \pm 1.44 \text{ nM/s}$<br>$k_{\text{cat}} = 0.3375 \text{ S}^{-1}$<br>$k_{\text{cat}}/K_m = 9,328 \text{ S}^{-1}\text{M}^{-1}$  |                                                                                    |                                                                                    | $\text{IC}_{50} = 23.96 \pm 0.72 \text{ nM}$                                         |                                 |
| M165W         | 11    | $K_m = 9.41 \pm 0.92 \mu\text{M}$<br>$V_{\text{max}} = 1.34 \pm 0.066 \text{ nM/s}$<br>$k_{\text{cat}} = 0.0001 \text{ S}^{-1}$<br>$k_{\text{cat}}/K_m = 12 \text{ S}^{-1}\text{M}^{-1}$      |                                                                                    |                                                                                    | $\text{IC}_{50} > 10 \mu\text{M}$                                                    |                                 |
| M165K         | 8     | $K_m = 36.41 \pm 2.31 \mu\text{M}$<br>$V_{\text{max}} = 10.09 \pm 0.33 \text{ nM/s}$<br>$k_{\text{cat}} = 0.0012 \text{ S}^{-1}$<br>$k_{\text{cat}}/K_m = 33 \text{ S}^{-1}\text{M}^{-1}$     |                                                                                    |                                                                                    | $\text{IC}_{50} > 10 \mu\text{M}$                                                    |                                 |
| M165T         | 7     | $K_m = 55.37 \pm 3.49 \mu\text{M}$<br>$V_{\text{max}} = 29.33 \pm 0.74 \text{ nM/s}$<br>$k_{\text{cat}} = 0.0733 \text{ S}^{-1}$<br>$k_{\text{cat}}/K_m = 1,324 \text{ S}^{-1}\text{M}^{-1}$  | $\text{IC}_{50} = 239.6 \pm 9.64 \text{ nM}$<br>$K_i = 138.0 \pm 7.86 \text{ nM}$  | $\text{IC}_{50} = 109.2 \pm 4.92 \text{ nM}$<br>$K_i = 33.58 \pm 1.78 \text{ nM}$  | $\text{IC}_{50} = 94.68 \pm 5.94 \text{ nM}$<br>$K_i = 52.68 \pm 4.68 \text{ nM}$    |                                 |
| M165R         | 5     | $K_m = 7.83 \pm 0.76 \mu\text{M}$<br>$V_{\text{max}} = 2.32 \pm 0.11 \text{ nM/s}$<br>$k_{\text{cat}} = 0.0003 \text{ S}^{-1}$<br>$k_{\text{cat}}/K_m = 33 \text{ S}^{-1}\text{M}^{-1}$       |                                                                                    |                                                                                    | $\text{IC}_{50} > 10 \mu\text{M}$                                                    |                                 |
| M165A         | 4     | $K_m = 50.82 \pm 3.76 \mu\text{M}$<br>$V_{\text{max}} = 36.68 \pm 1.99 \text{ nM/s}$<br>$k_{\text{cat}} = 0.3668 \text{ S}^{-1}$<br>$k_{\text{cat}}/K_m = 7,218 \text{ S}^{-1}\text{M}^{-1}$  |                                                                                    |                                                                                    | $\text{IC}_{50} = 23.28 \pm 1.88 \text{ nM}$                                         |                                 |
| M165G         | 3     | $K_m = 56.00 \pm 4.91 \mu\text{M}$<br>$V_{\text{max}} = 24.53 \pm 0.86 \text{ nM/s}$<br>$k_{\text{cat}} = 0.0245 \text{ S}^{-1}$<br>$k_{\text{cat}}/K_m = 438 \text{ S}^{-1}\text{M}^{-1}$    |                                                                                    |                                                                                    | $\text{IC}_{50} = 243.5 \pm 16.40 \text{ nM}$                                        |                                 |
| M165F         | 3     | $K_m = 74.74 \pm 3.47 \mu\text{M}$<br>$V_{\text{max}} = 11.72 \pm 0.24 \text{ nM/s}$<br>$k_{\text{cat}} = 0.0059 \text{ S}^{-1}$<br>$k_{\text{cat}}/K_m = 78 \text{ S}^{-1}\text{M}^{-1}$     |                                                                                    |                                                                                    | $\text{IC}_{50} = 1,336 \pm 49.13 \text{ nM}$                                        |                                 |



|               |       |                                                                                                                                                                                               |                                                                                   |                                                                                  |                                                                                    |              |
|---------------|-------|-----------------------------------------------------------------------------------------------------------------------------------------------------------------------------------------------|-----------------------------------------------------------------------------------|----------------------------------------------------------------------------------|------------------------------------------------------------------------------------|--------------|
| M165H         | 2     | $K_m = 14.71 \pm 1.92 \mu\text{M}$<br>$V_{\text{max}} = 3.49 \pm 0.13 \text{ nM/s}$<br>$k_{\text{cat}} = 0.0003 \text{ S}^{-1}$<br>$k_{\text{cat}}/K_m = 20 \text{ S}^{-1}\text{M}^{-1}$      |                                                                                   |                                                                                  | $\text{IC}_{50} > 10 \mu\text{M}$                                                  |              |
| M165P         | 2     | $K_m = 0.11 \pm 0.024 \mu\text{M}$<br>$V_{\text{max}} = 1.02 \pm 0.10 \text{ nM/s}$<br>$k_{\text{cat}} = 0.0001 \text{ S}^{-1}$<br>$k_{\text{cat}}/K_m = 773 \text{ S}^{-1}\text{M}^{-1}$     |                                                                                   |                                                                                  | $\text{IC}_{50} > 10 \mu\text{M}$                                                  |              |
| M165C         | 1     | $K_m = 46.24 \pm 2.54 \mu\text{M}$<br>$V_{\text{max}} = 33.39 \pm 0.96 \text{ nM/s}$<br>$k_{\text{cat}} = 0.3339 \text{ S}^{-1}$<br>$k_{\text{cat}}/K_m = 7,221 \text{ S}^{-1}\text{M}^{-1}$  |                                                                                   |                                                                                  | $\text{IC}_{50} = 24.84 \pm 1.77 \text{ nM}$                                       |              |
| M165D         | 1     | $K_m = 68.73 \pm 4.65 \mu\text{M}$<br>$V_{\text{max}} = 16.03 \pm 0.46 \text{ nM/s}$<br>$k_{\text{cat}} = 0.0178 \text{ S}^{-1}$<br>$k_{\text{cat}}/K_m = 258 \text{ S}^{-1}\text{M}^{-1}$    |                                                                                   |                                                                                  | $\text{IC}_{50} = 147.6 \pm 10.59 \text{ nM}$                                      |              |
| M165 deletion | 67    | $K_m = 35.12 \pm 4.13 \mu\text{M}$<br>$V_{\text{max}} = 2.30 \pm 0.095 \text{ nM/s}$<br>$k_{\text{cat}} = 0.0002 \text{ S}^{-1}$<br>$k_{\text{cat}}/K_m = 7 \text{ S}^{-1}\text{M}^{-1}$      |                                                                                   |                                                                                  |                                                                                    |              |
| E166Q         | 4,682 | $K_m = 36.04 \pm 3.16 \mu\text{M}$<br>$V_{\text{max}} = 50.18 \pm 1.55 \text{ nM/s}$<br>$k_{\text{cat}} = 0.4014 \text{ S}^{-1}$<br>$k_{\text{cat}}/K_m = 11,139 \text{ S}^{-1}\text{M}^{-1}$ | $\text{IC}_{50} = 52.31 \pm 2.06 \text{ nM}$<br>$K_i = 47.10 \pm 3.49 \text{ nM}$ | $\text{IC}_{50} = 14.88 \pm 0.47 \text{ nM}$<br>$K_i = 4.45 \pm 0.39 \text{ nM}$ | $\text{IC}_{50} = 27.87 \pm 2.11 \text{ nM}$<br>$K_i = 8.37 \pm 0.74 \text{ nM}$   | Apo:<br>8D4N |
| E166H         | 235   | $K_m = 55.96 \pm 5.14 \mu\text{M}$<br>$V_{\text{max}} = 17.55 \pm 0.65 \text{ nM/s}$<br>$k_{\text{cat}} = 0.0351 \text{ S}^{-1}$<br>$k_{\text{cat}}/K_m = 627 \text{ S}^{-1}\text{M}^{-1}$    |                                                                                   |                                                                                  | $\text{IC}_{50} = 9,598 \pm 1,675 \text{ nM}$                                      |              |
| E166G         | 16    | $K_m = 32.90 \pm 3.16 \mu\text{M}$<br>$V_{\text{max}} = 24.39 \pm 0.98 \text{ nM/s}$<br>$k_{\text{cat}} = 0.04878 \text{ S}^{-1}$<br>$k_{\text{cat}}/K_m = 1,483 \text{ S}^{-1}\text{M}^{-1}$ | $K_i = 85.00 \pm 8.16 \text{ nM}$                                                 | $K_i = 13.54 \pm 1.69 \text{ nM}$                                                | $\text{IC}_{50} = 92.15 \pm 6.49 \text{ nM}$<br>$K_i = 30.89 \pm 2.55 \text{ nM}$  |              |
| E166K         | 10    | $K_m = 50.12 \pm 4.68 \mu\text{M}$<br>$V_{\text{max}} = 25.93 \pm 1.17 \text{ nM/s}$<br>$k_{\text{cat}} = 0.02593 \text{ S}^{-1}$<br>$k_{\text{cat}}/K_m = 517 \text{ S}^{-1}\text{M}^{-1}$   |                                                                                   |                                                                                  | $\text{IC}_{50} = 1,994 \pm 175.1 \text{ nM}$                                      |              |
| E166V         | 8     | $K_m = 50.25 \pm 2.81 \mu\text{M}$<br>$V_{\text{max}} = 25.01 \pm 0.54 \text{ nM/s}$<br>$k_{\text{cat}} = 0.0572 \text{ S}^{-1}$<br>$k_{\text{cat}}/K_m = 1,138 \text{ S}^{-1}\text{M}^{-1}$  | $K_i = 584.4 \pm 40.27 \text{ nM}$                                                | $K_i = 666.5 \pm 73.39 \text{ nM}$                                               | $\text{IC}_{50} > 10,000 \text{ nM}$<br>$K_i = 10,384 \pm 673.3 \text{ nM}$        |              |
| E166A         | 5     | $K_m = 47.05 \pm 2.49 \mu\text{M}$<br>$V_{\text{max}} = 17.16 \pm 0.18 \text{ nM/s}$<br>$k_{\text{cat}} = 0.0686 \text{ S}^{-1}$<br>$k_{\text{cat}}/K_m = 1,459 \text{ S}^{-1}\text{M}^{-1}$  | $K_i = 139.6 \pm 14.22 \text{ nM}$                                                | $K_i = 22.64 \pm 2.49 \text{ nM}$                                                | $\text{IC}_{50} = 153.0 \pm 10.28 \text{ nM}$<br>$K_i = 89.29 \pm 6.47 \text{ nM}$ |              |
| E166L         | 3     | $K_m = 18.73 \pm 0.99 \mu\text{M}$<br>$V_{\text{max}} = 2.16 \pm 0.034 \text{ nM/s}$<br>$k_{\text{cat}} = 0.000432 \text{ S}^{-1}$<br>$k_{\text{cat}}/K_m = 23 \text{ S}^{-1}\text{M}^{-1}$   |                                                                                   |                                                                                  | $\text{IC}_{50} = 214.2 \pm 18.57 \text{ nM}$                                      |              |
| E166Y         | 2     | $K_m = 27.92 \pm 1.67 \mu\text{M}$<br>$V_{\text{max}} = 11.00 \pm 0.43 \text{ nM/s}$<br>$k_{\text{cat}} = 0.011 \text{ S}^{-1}$<br>$k_{\text{cat}}/K_m = 394 \text{ S}^{-1}\text{M}^{-1}$     |                                                                                   |                                                                                  | $\text{IC}_{50} = 3,711 \pm 283.1 \text{ nM}$                                      |              |
| E166I         | 1     | $K_m = 37.82 \pm 3.77 \mu\text{M}$<br>$V_{\text{max}} = 2.00 \pm 0.14 \text{ nM/s}$<br>$k_{\text{cat}} = 0.0002 \text{ S}^{-1}$<br>$k_{\text{cat}}/K_m = 5 \text{ S}^{-1}\text{M}^{-1}$       |                                                                                   |                                                                                  | $\text{IC}_{50} > 10,000 \text{ nM}$                                               |              |

|               |    |                                                                                                                                                                                        |                                                                                     |                                                                                   |                                                                                      |                                 |
|---------------|----|----------------------------------------------------------------------------------------------------------------------------------------------------------------------------------------|-------------------------------------------------------------------------------------|-----------------------------------------------------------------------------------|--------------------------------------------------------------------------------------|---------------------------------|
| E166 deletion | 67 | $K_m = 33.97 \pm 2.46 \mu\text{M}$<br>$V_{\max} = 1.92 \pm 0.048 \text{ nM/s}$<br>$k_{\text{cat}} = 0.0002 \text{ S}^{-1}$<br>$k_{\text{cat}}/K_m = 6 \text{ S}^{-1}\text{M}^{-1}$     |                                                                                     |                                                                                   |                                                                                      |                                 |
| H172T         | 99 | $K_m = 51.84 \pm 3.01 \mu\text{M}$<br>$V_{\max} = 6.29 \pm 0.14 \text{ nM/s}$<br>$k_{\text{cat}} = 0.0006 \text{ S}^{-1}$<br>$k_{\text{cat}}/K_m = 12 \text{ S}^{-1}\text{M}^{-1}$     | $\text{IC}_{50} > 10,000 \text{ nM}$<br>$K_i = 6,842 \pm 657.1 \text{ nM}$          | $\text{IC}_{50} = 7,888 \pm 420 \text{ nM}$<br>$K_i = 1,293 \pm 95.15 \text{ nM}$ | $\text{IC}_{50} > 10,000 \text{ nM}$<br>$K_i = 12,672 \pm 545.4 \text{ nM}$          |                                 |
| H172Y         | 21 | $K_m = 39.20 \pm 2.83 \mu\text{M}$<br>$V_{\max} = 15.26 \pm 0.39 \text{ nM/s}$<br>$k_{\text{cat}} = 0.0305 \text{ S}^{-1}$<br>$k_{\text{cat}}/K_m = 790 \text{ S}^{-1}\text{M}^{-1}$   | $\text{IC}_{50} = 449.2 \pm 27.81 \text{ nM}$<br>$K_i = 432.5 \pm 17.40 \text{ nM}$ | $\text{IC}_{50} = 126.4 \pm 5.64 \text{ nM}$<br>$K_i = 57.06 \pm 5.79 \text{ nM}$ | $\text{IC}_{50} = 279.3 \pm 23.09 \text{ nM}$<br>$K_i = 275.1 \pm 10.83 \text{ nM}$  | Apo:<br>8D4J<br>GC-376:<br>8D4K |
| H172E         | 16 | $K_m = 13.43 \pm 0.88 \mu\text{M}$<br>$V_{\max} = 3.23 \pm 0.12 \text{ nM/s}$<br>$k_{\text{cat}} = 0.000323 \text{ S}^{-1}$<br>$k_{\text{cat}}/K_m = 24 \text{ S}^{-1}\text{M}^{-1}$   |                                                                                     |                                                                                   | $\text{IC}_{50} > 10,000 \text{ nM}$                                                 |                                 |
| H172Q         | 12 | $K_m = 49.61 \pm 4.41 \mu\text{M}$<br>$V_{\max} = 21.53 \pm 0.74 \text{ nM/s}$<br>$k_{\text{cat}} = 0.1722 \text{ S}^{-1}$<br>$k_{\text{cat}}/K_m = 3,472 \text{ S}^{-1}\text{M}^{-1}$ | $K_i = 214.4 \pm 11.36 \text{ nM}$                                                  | $K_i = 42.66 \pm 3.56 \text{ nM}$                                                 | $\text{IC}_{50} = 152.1 \pm 8.01 \text{ nM}$<br>$K_i = 70.54 \pm 3.90 \text{ nM}$    |                                 |
| H172D         | 10 | $K_m = 53.01 \pm 4.79 \mu\text{M}$<br>$V_{\max} = 13.87 \pm 0.50 \text{ nM/s}$<br>$k_{\text{cat}} = 0.0277 \text{ S}^{-1}$<br>$k_{\text{cat}}/K_m = 523 \text{ S}^{-1}\text{M}^{-1}$   |                                                                                     |                                                                                   | $\text{IC}_{50} = 266.1 \pm 24.8 \text{ nM}$<br>$K_i = 170.6 \pm 11.30 \text{ nM}$   |                                 |
| H172L         | 8  | $K_m = 54.89 \pm 2.08 \mu\text{M}$<br>$V_{\max} = 5.99 \pm 0.11 \text{ nM/s}$<br>$k_{\text{cat}} = 0.0012 \text{ S}^{-1}$<br>$k_{\text{cat}}/K_m = 22 \text{ S}^{-1}\text{M}^{-1}$     |                                                                                     |                                                                                   | $\text{IC}_{50} = 3,380 \pm 295.48 \text{ nM}$<br>$K_i = 3,135 \pm 227.7 \text{ nM}$ |                                 |
| H172M         | 7  | $K_m = 60.05 \pm 3.65 \mu\text{M}$<br>$V_{\max} = 19.62 \pm 0.49 \text{ nM/s}$<br>$k_{\text{cat}} = 0.0196 \text{ S}^{-1}$<br>$k_{\text{cat}}/K_m = 327 \text{ S}^{-1}\text{M}^{-1}$   |                                                                                     |                                                                                   | $\text{IC}_{50} = 699.0 \pm 27.0 \text{ nM}$<br>$K_i = 290.6 \pm 18.98 \text{ nM}$   |                                 |
| H172A         | 7  | $K_m = 56.15 \pm 3.40 \mu\text{M}$<br>$V_{\max} = 27.33 \pm 0.67 \text{ nM/s}$<br>$k_{\text{cat}} = 0.0547 \text{ S}^{-1}$<br>$k_{\text{cat}}/K_m = 973 \text{ S}^{-1}\text{M}^{-1}$   |                                                                                     |                                                                                   | $\text{IC}_{50} = 374.7 \pm 30.5 \text{ nM}$<br>$K_i = 213.8 \pm 13.47 \text{ nM}$   |                                 |
| H172F         | 5  | $K_m = 66.53 \pm 2.68 \mu\text{M}$<br>$V_{\max} = 29.64 \pm 0.51 \text{ nM/s}$<br>$k_{\text{cat}} = 0.0741 \text{ S}^{-1}$<br>$k_{\text{cat}}/K_m = 1,114 \text{ S}^{-1}\text{M}^{-1}$ | $K_i = 188.5 \pm 12.41 \text{ nM}$                                                  | $K_i = 36.00 \pm 2.59 \text{ nM}$                                                 | $\text{IC}_{50} = 212.2 \pm 9.69 \text{ nM}$<br>$K_i = 46.60 \pm 5.59 \text{ nM}$    |                                 |
| H172I         | 5  | $K_m = 61.31 \pm 4.27 \mu\text{M}$<br>$V_{\max} = 58.34 \pm 1.68 \text{ nM/s}$<br>$k_{\text{cat}} = 0.00583 \text{ S}^{-1}$<br>$k_{\text{cat}}/K_m = 95 \text{ S}^{-1}\text{M}^{-1}$   |                                                                                     |                                                                                   | $\text{IC}_{50} > 10 \mu\text{M}$<br>$K_i > 10 \mu\text{M}$                          |                                 |
| H172V         | 5  | $K_m = 37.81 \pm 1.79 \mu\text{M}$<br>$V_{\max} = 7.14 \pm 0.12 \text{ nM/s}$<br>$k_{\text{cat}} = 0.0014 \text{ S}^{-1}$<br>$k_{\text{cat}}/K_m = 38 \text{ S}^{-1}\text{M}^{-1}$     |                                                                                     |                                                                                   | $\text{IC}_{50} > 10 \mu\text{M}$                                                    |                                 |
| H172N         | 5  | $K_m = 62.46 \pm 2.12 \mu\text{M}$<br>$V_{\max} = 15.33 \pm 0.22 \text{ nM/s}$<br>$k_{\text{cat}} = 0.0051 \text{ S}^{-1}$<br>$k_{\text{cat}}/K_m = 82 \text{ S}^{-1}\text{M}^{-1}$    |                                                                                     |                                                                                   | $\text{IC}_{50} = 1,827 \pm 337.24 \text{ nM}$<br>$K_i = 1,613 \pm 60.97 \text{ nM}$ |                                 |
| H172S         | 4  | $K_m = 65.48 \pm 2.33 \mu\text{M}$<br>$V_{\max} = 15.5 \pm 0.23 \text{ nM/s}$<br>$k_{\text{cat}} = 0.0052 \text{ S}^{-1}$<br>$k_{\text{cat}}/K_m = 79 \text{ S}^{-1}\text{M}^{-1}$     |                                                                                     |                                                                                   | $\text{IC}_{50} = 5,650 \pm 180.8 \text{ nM}$<br>$K_i = 2,204 \pm 142.8 \text{ nM}$  |                                 |

|               |      |                                                                                                                                                                                    |                                                                                   |                                                                                   |                                                                                   |  |
|---------------|------|------------------------------------------------------------------------------------------------------------------------------------------------------------------------------------|-----------------------------------------------------------------------------------|-----------------------------------------------------------------------------------|-----------------------------------------------------------------------------------|--|
| H172K         | 3    | $K_m = 55.53 \pm 2.57 \mu\text{M}$<br>$V_{\max} = 16.12 \pm 0.29$<br>nM/s<br>$k_{\text{cat}} = 0.0107 \text{ S}^{-1}$<br>$k_{\text{cat}}/K_m = 194 \text{ S}^{-1}\text{M}^{-1}$    |                                                                                   |                                                                                   | $\text{IC}_{50} = 1,030 \pm 50.53 \text{ nM}$                                     |  |
| H172R         | 1    | $K_m = 1.09 \pm 0.15 \mu\text{M}$<br>$V_{\max} = 1.19 \pm 0.037$<br>nM/s<br>$k_{\text{cat}} = 0.00036 \text{ S}^{-1}$<br>$k_{\text{cat}}/K_m = 262 \text{ S}^{-1}\text{M}^{-1}$    |                                                                                   |                                                                                   | $\text{IC}_{50} > 10 \mu\text{M}$                                                 |  |
| H172G         | 1    | $K_m = 74.20 \pm 2.31 \mu\text{M}$<br>$V_{\max} = 9.95 \pm 0.14$ nM/s<br>$k_{\text{cat}} = 0.0119 \text{ S}^{-1}$<br>$k_{\text{cat}}/K_m = 161 \text{ S}^{-1}\text{M}^{-1}$        |                                                                                   |                                                                                   | $\text{IC}_{50} = 810.2 \pm 19.30 \text{ nM}$                                     |  |
| H172C         | 1    | $K_m = 66.79 \pm 3.00 \mu\text{M}$<br>$V_{\max} = 12.59 \pm 0.24$<br>nM/s<br>$k_{\text{cat}} = 0.0094 \text{ S}^{-1}$<br>$k_{\text{cat}}/K_m = 141 \text{ S}^{-1}\text{M}^{-1}$    |                                                                                   |                                                                                   | $\text{IC}_{50} = 3,056 \pm 158.3 \text{ nM}$                                     |  |
| H172 deletion | 59   | $K_m = 39.14 \pm 6.23 \mu\text{M}$<br>$V_{\max} = 6.81 \pm 0.39$ nM/s<br>$k_{\text{cat}} = 0.0007 \text{ S}^{-1}$<br>$k_{\text{cat}}/K_m = 17 \text{ S}^{-1}\text{M}^{-1}$         |                                                                                   |                                                                                   |                                                                                   |  |
| Q189K         | 168  | $K_m = 41.45 \pm 2.66 \mu\text{M}$<br>$V_{\max} = 39.78 \pm 1.01$<br>nM/s<br>$k_{\text{cat}} = 0.16 \text{ S}^{-1}$<br>$k_{\text{cat}}/K_m = 3,800 \text{ S}^{-1}\text{M}^{-1}$    | $\text{IC}_{50} = 73.65 \pm 4.09 \text{ nM}$<br>$K_i = 64.09 \pm 3.45 \text{ nM}$ | $\text{IC}_{50} = 37.23 \pm 0.83 \text{ nM}$<br>$K_i = 14.35 \pm 1.65 \text{ nM}$ | $\text{IC}_{50} = 39.31 \pm 1.92 \text{ nM}$<br>$K_i = 14.60 \pm 1.53 \text{ nM}$ |  |
| Q189F         | 39   | $K_m = 26.02 \pm 2.40 \mu\text{M}$<br>$V_{\max} = 19.49 \pm 1.16$<br>nM/s<br>$k_{\text{cat}} = 0.3118 \text{ S}^{-1}$<br>$k_{\text{cat}}/K_m = 11,985 \text{ S}^{-1}\text{M}^{-1}$ |                                                                                   |                                                                                   | $\text{IC}_{50} = 34.02 \pm 1.47 \text{ nM}$                                      |  |
| Q189R         | 27   | $K_m = 42.63 \pm 2.72 \mu\text{M}$<br>$V_{\max} = 21.84 \pm 0.52$<br>nM/s<br>$k_{\text{cat}} = 0.1092 \text{ S}^{-1}$<br>$k_{\text{cat}}/K_m = 2,562 \text{ S}^{-1}\text{M}^{-1}$  |                                                                                   |                                                                                   | $\text{IC}_{50} = 37.82 \pm 1.16 \text{ nM}$                                      |  |
| Q189H         | 20   | $K_m = 42.83 \pm 3.24 \mu\text{M}$<br>$V_{\max} = 18.05 \pm 0.51$<br>nM/s<br>$k_{\text{cat}} = 0.1444 \text{ S}^{-1}$<br>$k_{\text{cat}}/K_m = 3,371 \text{ S}^{-1}\text{M}^{-1}$  |                                                                                   |                                                                                   | $\text{IC}_{50} = 32.71 \pm 1.04 \text{ nM}$                                      |  |
| Q189L         | 19   | $K_m = 47.00 \pm 3.83 \mu\text{M}$<br>$V_{\max} = 15.42 \pm 0.48$<br>nM/s<br>$k_{\text{cat}} = 0.0617 \text{ S}^{-1}$<br>$k_{\text{cat}}/K_m = 1,312 \text{ S}^{-1}\text{M}^{-1}$  |                                                                                   |                                                                                   | $\text{IC}_{50} = 39.25 \pm 1.47 \text{ nM}$                                      |  |
| Q189P         | 18   | $K_m = 29.57 \pm 2.25 \mu\text{M}$<br>$V_{\max} = 19.07 \pm 0.97$<br>nM/s<br>$k_{\text{cat}} = 0.3051 \text{ S}^{-1}$<br>$k_{\text{cat}}/K_m = 10,319 \text{ S}^{-1}\text{M}^{-1}$ |                                                                                   |                                                                                   | $\text{IC}_{50} = 14.08 \pm 0.70 \text{ nM}$                                      |  |
| Q189S         | 8    | $K_m = 27.97 \pm 3.26 \mu\text{M}$<br>$V_{\max} = 17.28 \pm 0.66$<br>nM/s<br>$k_{\text{cat}} = 0.1728 \text{ S}^{-1}$<br>$k_{\text{cat}}/K_m = 6,178 \text{ S}^{-1}\text{M}^{-1}$  |                                                                                   |                                                                                   | $\text{IC}_{50} = 25.34 \pm 1.72 \text{ nM}$                                      |  |
| Q189E         | 8    | $K_m = 23.03 \pm 1.71 \mu\text{M}$<br>$V_{\max} = 29.75 \pm 1.91$<br>nM/s<br>$k_{\text{cat}} = 0.4760 \text{ S}^{-1}$<br>$k_{\text{cat}}/K_m = 20,669 \text{ S}^{-1}\text{M}^{-1}$ | $\text{IC}_{50} = 80.19 \pm 6.31 \text{ nM}$<br>$K_i = 36.86 \pm 2.97 \text{ nM}$ | $\text{IC}_{50} = 42.34 \pm 3.07 \text{ nM}$<br>$K_i = 1.34 \pm 0.14 \text{ nM}$  | $\text{IC}_{50} = 49.71 \pm 3.19 \text{ nM}$<br>$K_i = 4.51 \pm 0.29 \text{ nM}$  |  |
| Q189 deletion | 1093 | $K_m = 59.36 \pm 5.73 \mu\text{M}$<br>$V_{\max} = 11.67 \pm 0.14$<br>nM/s<br>$k_{\text{cat}} = 0.0039 \text{ S}^{-1}$<br>$k_{\text{cat}}/K_m = 66 \text{ S}^{-1}\text{M}^{-1}$     |                                                                                   |                                                                                   |                                                                                   |  |

|       |     |                                                                                                                                                                                                |                                                                                     |                                                                                     |                                                                                    |                 |
|-------|-----|------------------------------------------------------------------------------------------------------------------------------------------------------------------------------------------------|-------------------------------------------------------------------------------------|-------------------------------------------------------------------------------------|------------------------------------------------------------------------------------|-----------------|
| Q192T | 187 | $K_m = 32.94 \pm 2.96 \mu\text{M}$<br>$V_{\text{max}} = 19.94 \pm 0.62 \text{ nM/s}$<br>$k_{\text{cat}} = 0.0399 \text{ S}^{-1}$<br>$k_{\text{cat}}/K_m = 1,200 \text{ S}^{-1}\text{M}^{-1}$   | $\text{IC}_{50} = 237.2 \pm 17.12 \text{ nM}$<br>$K_i = 119.7 \pm 6.57 \text{ nM}$  | $\text{IC}_{50} = 185.5 \pm 13.90 \text{ nM}$<br>$K_i = 71.40 \pm 4.26 \text{ nM}$  | $\text{IC}_{50} = 102.6 \pm 5.52 \text{ nM}$<br>$K_i = 45.69 \pm 4.43 \text{ nM}$  | GC-376:<br>8DGB |
| Q192K | 63  | $K_m = 38.29 \pm 2.05 \mu\text{M}$<br>$V_{\text{max}} = 12.21 \pm 0.23 \text{ nM/s}$<br>$k_{\text{cat}} = 0.0122 \text{ S}^{-1}$<br>$k_{\text{cat}}/K_m = 319 \text{ S}^{-1}\text{M}^{-1}$     | $\text{IC}_{50} = 303.6 \pm 27.42 \text{ nM}$<br>$K_i = 430.3 \pm 22.35 \text{ nM}$ | $\text{IC}_{50} = 324.0 \pm 18.93 \text{ nM}$<br>$K_i = 299.5 \pm 23.79 \text{ nM}$ | $\text{IC}_{50} = 219.1 \pm 9.62 \text{ nM}$<br>$K_i = 88.90 \pm 4.88 \text{ nM}$  |                 |
| Q192S | 29  | $K_m = 46.24 \pm 2.09 \mu\text{M}$<br>$V_{\text{max}} = 28.69 \pm 0.49 \text{ nM/s}$<br>$k_{\text{cat}} = 0.0574 \text{ S}^{-1}$<br>$k_{\text{cat}}/K_m = 1,241 \text{ S}^{-1}\text{M}^{-1}$   | $\text{IC}_{50} = 319.0 \pm 12.02 \text{ nM}$<br>$K_i = 227.9 \pm 17.06 \text{ nM}$ | $\text{IC}_{50} = 183.9 \pm 8.16 \text{ nM}$<br>$K_i = 82.32 \pm 4.23 \text{ nM}$   | $\text{IC}_{50} = 217.3 \pm 10.59 \text{ nM}$<br>$K_i = 75.56 \pm 8.45 \text{ nM}$ |                 |
| Q192L | 12  | $K_m = 62.36 \pm 3.76 \mu\text{M}$<br>$V_{\text{max}} = 31.72 \pm 0.79 \text{ nM/s}$<br>$k_{\text{cat}} = 0.1586 \text{ S}^{-1}$<br>$k_{\text{cat}}/K_m = 2,543 \text{ S}^{-1}\text{M}^{-1}$   | $K_i = 165.3 \pm 17.86 \text{ nM}$                                                  | $K_i = 25.39 \pm 1.81 \text{ nM}$                                                   | $\text{IC}_{50} = 121.9 \pm 5.51 \text{ nM}$<br>$K_i = 70.99 \pm 7.02 \text{ nM}$  |                 |
| Q192R | 12  | $K_m = 59.39 \pm 4.71 \mu\text{M}$<br>$V_{\text{max}} = 17.70 \pm 0.57 \text{ nM/s}$<br>$k_{\text{cat}} = 0.0283 \text{ S}^{-1}$<br>$k_{\text{cat}}/K_m = 477 \text{ S}^{-1}\text{M}^{-1}$     |                                                                                     |                                                                                     | $\text{IC}_{50} = 229.6 \pm 11.54 \text{ nM}$                                      |                 |
| Q192N | 9   | $K_m = 54.93 \pm 3.37 \mu\text{M}$<br>$V_{\text{max}} = 9.19 \pm 0.22 \text{ nM/s}$<br>$k_{\text{cat}} = 0.0408 \text{ S}^{-1}$<br>$k_{\text{cat}}/K_m = 744 \text{ S}^{-1}\text{M}^{-1}$      |                                                                                     |                                                                                     | $\text{IC}_{50} = 73.69 \pm 4.96 \text{ nM}$                                       |                 |
| Q192A | 9   | $K_m = 59.42 \pm 3.02 \mu\text{M}$<br>$V_{\text{max}} = 35.25 \pm 0.0.73 \text{ nM/s}$<br>$k_{\text{cat}} = 0.1058 \text{ S}^{-1}$<br>$k_{\text{cat}}/K_m = 1,780 \text{ S}^{-1}\text{M}^{-1}$ | $K_i = 206.8 \pm 14.64 \text{ nM}$                                                  | $K_i = 62.84 \pm 5.63 \text{ nM}$                                                   | $\text{IC}_{50} = 140.7 \pm 3.93 \text{ nM}$<br>$K_i = 58.10 \pm 5.67 \text{ nM}$  |                 |
| Q192I | 8   | $K_m = 52.72 \pm 4.87 \mu\text{M}$<br>$V_{\text{max}} = 21.47 \pm 0.78 \text{ nM/s}$<br>$k_{\text{cat}} = 0.1031 \text{ S}^{-1}$<br>$k_{\text{cat}}/K_m = 1,955 \text{ S}^{-1}\text{M}^{-1}$   | $K_i = 179.8 \pm 10.86 \text{ nM}$                                                  | $K_i = 41.16 \pm 5.37 \text{ nM}$                                                   | $\text{IC}_{50} = 109.9 \pm 2.45 \text{ nM}$<br>$K_i = 43.53 \pm 3.13 \text{ nM}$  |                 |
| Q192P | 8   | $K_m = 55.88 \pm 3.74 \mu\text{M}$<br>$V_{\text{max}} = 20.34 \pm 0.55 \text{ nM/s}$<br>$k_{\text{cat}} = 0.0814 \text{ S}^{-1}$<br>$k_{\text{cat}}/K_m = 1,456 \text{ S}^{-1}\text{M}^{-1}$   | $K_i = 217.1 \pm 19.24 \text{ nM}$                                                  | $K_i = 80.95 \pm 8.68 \text{ nM}$                                                   | $\text{IC}_{50} = 135.1 \pm 7.17 \text{ nM}$<br>$K_i = 76.19 \pm 5.66 \text{ nM}$  |                 |
| Q192G | 7   | $K_m = 68.11 \pm 2.55 \mu\text{M}$<br>$V_{\text{max}} = 20.69 \pm 0.33 \text{ nM/s}$<br>$k_{\text{cat}} = 0.0414 \text{ S}^{-1}$<br>$k_{\text{cat}}/K_m = 608 \text{ S}^{-1}\text{M}^{-1}$     | $K_i = 277.6 \pm 19.21 \text{ nM}$                                                  | $K_i = 78.78 \pm 7.01 \text{ nM}$                                                   | $\text{IC}_{50} = 319.1 \pm 12.73 \text{ nM}$<br>$K_i = 106.3 \pm 5.84 \text{ nM}$ |                 |
| Q192H | 7   | $K_m = 60.51 \pm 3.86 \mu\text{M}$<br>$V_{\text{max}} = 27.12 \pm 0.71 \text{ nM/s}$<br>$k_{\text{cat}} = 0.0814 \text{ S}^{-1}$<br>$k_{\text{cat}}/K_m = 1,345 \text{ S}^{-1}\text{M}^{-1}$   | $K_i = 237.2 \pm 21.98 \text{ nM}$                                                  | $K_i = 61.19 \pm 3.93 \text{ nM}$                                                   | $\text{IC}_{50} = 169.4 \pm 7.27 \text{ nM}$<br>$K_i = 80.69 \pm 7.33 \text{ nM}$  |                 |
| Q192Y | 7   | $K_m = 9.18 \pm 0.62 \mu\text{M}$<br>$V_{\text{max}} = 2.64 \pm 0.12 \text{ nM/s}$<br>$k_{\text{cat}} = 0.0004 \text{ S}^{-1}$<br>$k_{\text{cat}}/K_m = 43 \text{ S}^{-1}\text{M}^{-1}$        |                                                                                     |                                                                                     | $\text{IC}_{50} > 10 \mu\text{M}$                                                  |                 |
| Q192V | 6   | $K_m = 59.77 \pm 3.01 \mu\text{M}$<br>$V_{\text{max}} = 18.36 \pm 0.38 \text{ nM/s}$<br>$k_{\text{cat}} = 0.0734 \text{ S}^{-1}$<br>$k_{\text{cat}}/K_m = 1,229 \text{ S}^{-1}\text{M}^{-1}$   | $\text{IC}_{50} = 136.1 \pm 5.66 \text{ nM}$<br>$K_i = 122.0 \pm 9.62 \text{ nM}$   | $\text{IC}_{50} = 82.17 \pm 2.54 \text{ nM}$<br>$K_i = 78.46 \pm 6.47 \text{ nM}$   | $\text{IC}_{50} = 95.58 \pm 4.23 \text{ nM}$<br>$K_i = 30.87 \pm 1.12 \text{ nM}$  |                 |
| Q192W | 5   | $K_m = 50.15 \pm 4.32 \mu\text{M}$<br>$V_{\text{max}} = 24.00 \pm 0.80 \text{ nM/s}$<br>$k_{\text{cat}} = 0.0691 \text{ S}^{-1}$<br>$k_{\text{cat}}/K_m = 1,378 \text{ S}^{-1}\text{M}^{-1}$   | $K_i = 149.0 \pm 12.78 \text{ nM}$                                                  | $K_i = 32.88 \pm 2.89 \text{ nM}$                                                   | $\text{IC}_{50} = 65.94 \pm 2.54 \text{ nM}$<br>$K_i = 43.65 \pm 2.32 \text{ nM}$  |                 |

|                 |      |                                                                                                                                                                                              |                                                                                     |                                                                                    |                                                                                     |  |
|-----------------|------|----------------------------------------------------------------------------------------------------------------------------------------------------------------------------------------------|-------------------------------------------------------------------------------------|------------------------------------------------------------------------------------|-------------------------------------------------------------------------------------|--|
| Q192E           | 5    | $K_m = 60.37 \pm 3.88 \mu\text{M}$<br>$V_{\text{max}} = 32.98 \pm 0.87 \text{ nM/s}$<br>$k_{\text{cat}} = 0.0660 \text{ S}^{-1}$<br>$k_{\text{cat}}/K_m = 1,093 \text{ S}^{-1}\text{M}^{-1}$ | $K_i = 296.1 \pm 21.17 \text{ nM}$                                                  | $K_i = 39.21 \pm 2.92 \text{ nM}$                                                  | $\text{IC}_{50} = 193.1 \pm 9.27 \text{ nM}$<br>$K_i = 114.4 \pm 10.82 \text{ nM}$  |  |
| Q192C           | 3    | $K_m = 55.53 \pm 3.46 \mu\text{M}$<br>$V_{\text{max}} = 21.80 \pm 0.54 \text{ nM/s}$<br>$k_{\text{cat}} = 0.0872 \text{ S}^{-1}$<br>$k_{\text{cat}}/K_m = 1,570 \text{ S}^{-1}\text{M}^{-1}$ | $K_i = 147.7 \pm 16.25 \text{ nM}$                                                  | $K_i = 27.98 \pm 1.58 \text{ nM}$                                                  | $\text{IC}_{50} = 96.82 \pm 2.40 \text{ nM}$<br>$K_i = 54.12 \pm 2.79 \text{ nM}$   |  |
| Q192D           | 3    | $K_m = 68.35 \pm 5.76 \mu\text{M}$<br>$V_{\text{max}} = 18.58 \pm 0.67 \text{ nM/s}$<br>$k_{\text{cat}} = 0.0372 \text{ S}^{-1}$<br>$k_{\text{cat}}/K_m = 544 \text{ S}^{-1}\text{M}^{-1}$   |                                                                                     |                                                                                    | $\text{IC}_{50} = 271.5 \pm 17.63 \text{ nM}$                                       |  |
| Q192F           | 2    | $K_m = 54.41 \pm 4.34 \mu\text{M}$<br>$V_{\text{max}} = 42.44 \pm 1.35 \text{ nM/s}$<br>$k_{\text{cat}} = 0.1698 \text{ S}^{-1}$<br>$k_{\text{cat}}/K_m = 3,120 \text{ S}^{-1}\text{M}^{-1}$ | $K_i = 137.5 \pm 11.09 \text{ nM}$                                                  | $K_i = 21.41 \pm 2.28 \text{ nM}$                                                  | $\text{IC}_{50} = 92.68 \pm 6.53 \text{ nM}$<br>$K_i = 85.50 \pm 12.51 \text{ nM}$  |  |
| Q192 deletion   | 1070 | $K_m = 34.20 \pm 4.24 \mu\text{M}$<br>$V_{\text{max}} = 3.00 \pm 0.13 \text{ nM/s}$<br>$k_{\text{cat}} = 0.0008 \text{ S}^{-1}$<br>$k_{\text{cat}}/K_m = 22 \text{ S}^{-1}\text{M}^{-1}$     |                                                                                     |                                                                                    |                                                                                     |  |
| Q189E/<br>H172Y | 0    | $K_m = 61.34 \pm 4.83 \mu\text{M}$<br>$V_{\text{max}} = 24.76 \pm 0.80 \text{ nM/s}$<br>$k_{\text{cat}} = 0.0619 \text{ S}^{-1}$<br>$k_{\text{cat}}/K_m = 1,009 \text{ S}^{-1}\text{M}^{-1}$ | $\text{IC}_{50} = 652.7 \pm 30.98 \text{ nM}$<br>$K_i = 618.2 \pm 36.42 \text{ nM}$ | $\text{IC}_{50} = 169.9 \pm 11.54 \text{ nM}$<br>$K_i = 83.84 \pm 4.61 \text{ nM}$ | $\text{IC}_{50} = 603.7 \pm 17.42 \text{ nM}$<br>$K_i = 528.5 \pm 47.25 \text{ nM}$ |  |

<sup>a</sup>The occurrence of mutation was analyzed using the GISAID CoVsurver as of September 14<sup>th</sup>, 2022 (latest update on July 7, 2022).  $k_{\text{cat}}$ ,  $V_{\text{max}}$ ,  $K_m$ ,  $k_{\text{cat}}/K_m$ ,  $\text{IC}_{50}$  and  $K_i$  values are the average of two repeats. Enzymatically inactive mutants are colored in yellow. M<sup>PRO</sup> mutants that have comparable enzymatic activity as the WT ( $k_{\text{cat}}/K_m < 10$ -fold change) and are resistant to nirmatrelvir ( $K_i > 10$ -fold increase) are colored in red.

**Table S2. Thermal shift assay results of nirmatrelvir with M<sup>PRO</sup> mutants.**

| nirmatrelvir<br>( $\mu\text{M}$ ) | $\Delta T_m$ ( $^{\circ}\text{C}$ ) |       |       |       |       |       |       |       |       |       |       |
|-----------------------------------|-------------------------------------|-------|-------|-------|-------|-------|-------|-------|-------|-------|-------|
|                                   | WT                                  | S144M | S144F | S144A | S144G | S144Y | M165T | E166A | E166G | H172Q | H172F |
| 200                               | 19.95                               | 12.91 | 16.55 | 15.96 | 15.16 | 17.05 | 15.40 | 12.34 | 17.34 | 12.21 | 12.90 |
| 60                                | 19.07                               | 10.45 | 13.67 | 14.39 | 12.00 | 14.10 | 12.60 | 10.23 | 14.71 | 9.26  | 10.94 |
| 20                                | 17.97                               | 6.81  | 10.94 | 12.94 | 8.35  | 11.23 | 9.94  | 6.05  | 11.25 | 5.33  | 8.41  |
| 6                                 | 11.65                               | 1.26  | 7.71  | 8.71  | 1.82  | 8.49  | 5.95  | 2.90  | 7.34  | 1.19  | 5.47  |
| 2                                 | 9.40                                | 0.56  | 1.68  | 5.65  | 0.42  | 3.58  | 1.40  | 1.41  | 2.65  | 0.28  | 1.47  |
| 0.6                               | 2.33                                | 0.28  | 0.56  | 1.79  | 0.14  | 0.28  | 0.28  | 1.20  | 1.12  | -0.07 | 0.49  |
| 0.2                               | 0.68                                | 0.14  | 0.21  | 0.31  | -0.14 | -0.14 | -0.07 | 0.00  | 0.06  | -0.14 | 0.14  |
| nirmatrelvir<br>( $\mu\text{M}$ ) | $\Delta T_m$ ( $^{\circ}\text{C}$ ) |       |       |       |       |       |       |       |       |       |       |
|                                   | Q192T                               | Q192S | Q192L | Q192A | Q192I | Q192P | Q192H | Q192V | Q192W | Q192C | Q192F |
| 200                               | 15.36                               | 15.01 | 16.49 | 13.53 | 17.10 | 16.20 | 16.17 | 16.95 | 15.49 | 15.74 | 14.94 |
| 60                                | 12.28                               | 11.99 | 12.89 | 12.13 | 13.67 | 13.75 | 12.81 | 14.43 | 13.17 | 11.80 | 13.43 |
| 20                                | 9.12                                | 8.42  | 9.13  | 8.74  | 10.94 | 10.45 | 8.89  | 11.35 | 9.89  | 8.12  | 10.00 |
| 6                                 | 4.98                                | 3.65  | 5.55  | 5.50  | 5.54  | 5.75  | 1.82  | 7.22  | 6.46  | 4.77  | 6.41  |
| 2                                 | 2.03                                | 1.75  | 2.23  | 2.28  | 1.33  | 1.40  | 0.56  | 2.24  | 2.04  | 1.65  | 2.35  |
| 0.6                               | 0.77                                | 0.70  | 0.71  | 0.91  | 0.49  | 0.28  | 0.28  | 0.63  | 0.10  | 0.00  | 0.95  |
| 0.2                               | -0.07                               | 0.28  | 0.07  | 0.44  | 0.14  | 0.14  | 0.07  | 0.14  | 0.03  | 0.02  | 0.39  |

**Table S3. X-ray Data Collection and Refinement Statistics**

| <b>Data Collection</b>                                  |                 |              |                 |              |                 |                 |              |             |              |             |                 |
|---------------------------------------------------------|-----------------|--------------|-----------------|--------------|-----------------|-----------------|--------------|-------------|--------------|-------------|-----------------|
| Structure (PDB ID)                                      | <u>8D4J</u>     | <u>8D4K</u>  | <u>8D4L</u>     | <u>8D4M</u>  | <u>8D4N</u>     | <u>8DFN</u>     | <u>8DD1</u>  | <u>8DFE</u> | <u>8DD9</u>  | <u>8DGB</u> | <u>8DCZ</u>     |
| Mutation                                                | H172Y           | H172Y        | S144A           | S144A        | E166Q           | H164N           | H164N        | S144L       | S144L        | Q192T       | M165Y           |
| Ligand                                                  | Apo             | GC376        | Apo             | GC376        | Apo             | Apo             | GC376        | Apo         | GC376        | GC376       | Nirmatrelvir    |
| Space Group                                             | P2 <sub>1</sub> | C2           | P2 <sub>1</sub> | C2           | P2 <sub>1</sub> | P2 <sub>1</sub> | C2           | C2          | C2           | P1          | P2 <sub>1</sub> |
| <b>Cell Dimensions</b>                                  |                 |              |                 |              |                 |                 |              |             |              |             |                 |
| <i>a</i> , <i>b</i> , <i>c</i> (Å)                      | 44.962          | 114.549      | 44.625          | 114.134      | 44.816          | 44.668          | 113.899      | 113.554     | 113.707      | 47.03       | 45.566          |
|                                                         | 53.474          | 53.111       | 53.707          | 53.653       | 53.687          | 53.738          | 53.55        | 54.075      | 53.153       | 53.241      | 53.786          |
|                                                         | 114.185         | 45.643       | 114.685         | 45.457       | 114.532         | 114.781         | 45.321       | 44.615      | 45.345       | 59.532      | 114.76          |
| $\alpha$ , $\beta$ , $\gamma$ (°)                       | 90              | 90           | 90              | 90           | 90              | 90              | 90           | 90          | 90           | 67          | 90              |
|                                                         | 101.14          | 102.67       | 101.3           | 101.97       | 101.79          | 100.81          | 101.9        | 100.73      | 102.22       | 79.57       | 100.53          |
|                                                         | 90              | 90           | 90              | 90           | 90              | 90              | 90           | 90          | 90           | 88.8        | 90              |
| Resolution (Å)                                          | 50-1.78         | 50-1.89      | 50-1.70         | 50-1.81      | 50-2.70         | 50-2.04         | 50-2.04      | 50-1.89     | 50-2.04      | 50-2.87     | 50-2.38         |
| No. Reflections                                         | 51114           | 21112        | 56762           | 24143        | 14631           | 33845           | 16735        | 20077       | 16416        | 10878       | 21947           |
| <i>R</i> <sub>merge</sub> (%)                           | 6.3             | 8.4          | 5.5             | 7.4          | 17.2            | 8.7             | 7.8          | 7.1         | 9.7          | 7.9         | 9.2             |
| <i>I</i> / $\sigma$ <i>I</i>                            | 24.2 (2.73)     | 20.35 (2.01) | 28.72 (3.46)    | 21.77 (2.34) | 9.13 (2.02)     | 16.75 (2.14)    | 22.18 (2.27) | 26.7 (2.63) | 13.59 (2.31) | 9.03 (3.06) | 12.33 (2.13)    |
| Completeness (%)                                        | 99.5            | 98.6         | 96.8            | 98.1         | 99.1            | 98.6            | 97.0         | 94.0        | 96.9         | 93.5        | 98.6            |
| Redundancy                                              | 3.5 (2.6)       | 4.1 (3.9)    | 3.4 (3.2)       | 3.9 (4.1)    | 3.7 (3.6)       | 5.2 (5.2)       | 4.9 (4.7)    | 6.2 (5.9)   | 3.7 (3.3)    | 2.2 (1.5)   | 4.0 (3.5)       |
| <b>Refinement</b>                                       |                 |              |                 |              |                 |                 |              |             |              |             |                 |
| Resolution (Å)                                          | 38.71-1.78      | 48.02-1.89   | 38.87-1.70      | 48.41-1.81   | 38.80-2.70      | 43.79-2.04      | 34.24-2.04   | 48.41-1.89  | 39.92-2.04   | 48.98-2.87  | 39.28-2.38      |
| <i>R</i> <sub>work</sub> / <i>R</i> <sub>free</sub> (%) | 16.6/20.9       | 16.6/22.4    | 17.1/21.3       | 17.2/22.9    | 20.6/25.8       | 19.1/25.1       | 18.5/24.8    | 20.8/26.8   | 16.5/22.8    | 22.7/27.2   | 19.2/25.1       |
| <b>No. Heavy Atoms</b>                                  |                 |              |                 |              |                 |                 |              |             |              |             |                 |
| Protein                                                 | 4912            | 2443         | 4912            | 2431         | 4844            | 4703            | 2345         | 2421        | 2411         | 4723        | 4757            |
| Ligand/Ion                                              | 6               | 29           | 0               | 29           | 0               | 0               | 29           | 0           | 29           | 58          | 70              |
| Water                                                   | 478             | 187          | 471             | 246          | 40              | 304             | 148          | 201         | 208          | 11          | 140             |
| <b>B-Factors (Å<sup>2</sup>)</b>                        |                 |              |                 |              |                 |                 |              |             |              |             |                 |
| Protein                                                 | 27.19           | 30.87        | 25.91           | 31.04        | 34.42           | 33.18           | 45.22        | 30.96       | 33.51        | 56.10       | 40.08           |
| Ligand/Ion                                              | 36.91           | 30.63        | 0               | 32.29        | 0               | 0               | 40.87        | 0           | 25.19        | 59.20       | 31.48           |
| Water                                                   | 34.53           | 37.51        | 33.21           | 37.49        | 20.3            | 36.22           | 48.83        | 34.38       | 38.29        | 54.78       | 37.38           |
| <b>Ramachandran Plot</b>                                |                 |              |                 |              |                 |                 |              |             |              |             |                 |
| Favored Region (%)                                      | 98.5            | 98.0         | 98.5            | 98.7         | 98.7            | 98.3            | 98.3         | 98.7        | 98.7         | 97.4        | 97.7            |
| Allowed Region (%)                                      | 1.5             | 2.0          | 1.5             | 1.3          | 1.0             | 1.3             | 1.3          | 1.3         | 1.3          | 2.6         | 2.0             |
| Outlier Region (%)                                      | 0.0             | 0.0          | 0.0             | 0.0          | 0.3             | 0.3             | 0.3          | 0.0         | 0.0          | 0.0         | 0.3             |

\*values in the parentheses represent highest resolution shells

**Table S4. Protein concentrations used for the  $K_m/V_{max}$ ,  $IC_{50}$  and  $K_i$  measurements.**



| <b>M<sup>pro</sup><br/>mutants</b> | <b>M<sup>pro</sup> concentration (μM)</b> |                        |                      |
|------------------------------------|-------------------------------------------|------------------------|----------------------|
|                                    | <b>K<sub>m</sub>/V<sub>max</sub></b>      | <b>IC<sub>50</sub></b> | <b>K<sub>i</sub></b> |
| WT                                 | 0.1                                       | 0.1                    | 0.005                |
| H41M                               | 10                                        |                        |                      |
| H41T                               | 10                                        |                        |                      |
| H41Y                               | 10                                        |                        |                      |
| M49I                               | 0.05                                      | 0.1                    | 0.025                |
| M49T                               | 0.0625                                    | 0.1                    | 0.005                |
| M49L                               | 0.0625                                    | 0.1                    | 0.003                |
| M49V                               | 0.125                                     | 0.125                  |                      |
| M49 deletion                       | 0.1                                       | 0.1                    | 0.05                 |
| T135I                              | 0.1                                       | 0.1                    | 0.05                 |
| T135 deletion                      | 5                                         |                        |                      |
| N142S                              | 0.1                                       | 0.1                    |                      |
| N142D                              | 0.125                                     | 0.125                  |                      |
| N142L                              | 0.0625                                    | 0.1                    |                      |
| N142I                              | 0.0625                                    | 0.1                    |                      |
| N142H                              | 0.125                                     | 0.125                  |                      |
| N142M                              | 0.0625                                    | 0.1                    |                      |
| N142K                              | 0.0625                                    | 0.1                    |                      |
| N142T                              | 0.0625                                    | 0.1                    |                      |
| N142Y                              | 0.0625                                    | 0.1                    |                      |
| N142 deletion                      | 5                                         |                        |                      |
| S144L                              | 2                                         | 2                      | 0.5                  |
| S144T                              | 0.75                                      | 0.75                   | 0.25                 |
| <b>S144M</b>                       | <b>0.4</b>                                | <b>0.4</b>             | <b>0.125</b>         |
| <b>L50F/S144M</b>                  | <b>0.15</b>                               | <b>0.15</b>            | <b>0.05</b>          |
| <b>S144F</b>                       | <b>0.25</b>                               | <b>0.25</b>            | <b>0.125</b>         |
| S144P                              | 10                                        | 10                     | 5                    |

|               |        |       |       |
|---------------|--------|-------|-------|
| S144A         | 0.25   | 0.25  | 0.04  |
| S144W         | 0.5    | 0.5   | 0.25  |
| S144E         | 1      | 1     | 0.2   |
| S144V         | 2      | 2     | 1     |
| S144H         | 0.5    | 0.5   | 0.25  |
| S144Q         | 1      | 1     | 0.5   |
| S144R         | 8      | 8     | 4     |
| S144G         | 0.125  | 0.125 | 0.05  |
| S144Y         | 0.25   | 0.25  | 0.125 |
| S144K         | 10     | 10    | 2     |
| S144D         | 2      | 2     |       |
| S144 deletion | 10     |       |       |
| H163W         | 10     |       |       |
| H164N         | 0.25   | 0.25  | 0.1   |
| H164 deletion | 10     |       |       |
| M165Y         | 2      | 2     | 0.25  |
| M165L         | 0.0625 | 0.1   | 0.003 |
| M165I         | 0.0625 | 0.1   | 0.005 |
| M165V         | 0.1    | 0.1   |       |
| M165W         | 12     | 12    |       |
| M165K         | 10     | 10    |       |
| M165T         | 0.4    | 0.4   | 0.15  |
| M165R         | 12     | 12    |       |
| M165A         | 0.1    | 0.1   |       |
| M165G         | 1      | 1     |       |
| M165F         | 2      | 2     |       |
| M165H         | 12     | 12    |       |
| M165P         | 12     | 12    |       |
| M165C         | 0.1    | 0.1   |       |

|               |       |       |        |
|---------------|-------|-------|--------|
| M165D         | 1.2   | 1.2   |        |
| M165 deletion | 10    |       |        |
| E166Q         | 0.125 | 0.125 | 0.0625 |
| E166H         | 0.5   | 0.5   |        |
| E166G         | 0.5   | 0.5   | 0.2    |
| E166K         | 1     | 1     |        |
| E166V         | 0.4   | 0.4   | 0.2    |
| E166A         | 0.25  | 0.25  | 0.125  |
| E166L         | 5     | 5     |        |
| E166Y         | 1     | 1     |        |
| E166I         | 10    | 10    |        |
| E166 deletion | 10    |       |        |
| H172T         | 10    | 10    | 2      |
| H172Y         | 0.5   | 0.5   | 0.15   |
| H172E         | 10    | 10    |        |
| H172Q         | 0.125 | 0.125 | 0.0625 |
| H172D         | 0.5   | 0.5   | 0.25   |
| H172L         | 5     | 5     | 2      |
| H172M         | 1     | 1     | 0.4    |
| H172A         | 0.5   | 0.5   | 0.25   |
| H172F         | 0.4   | 0.4   | 0.125  |
| H172I         | 10    | 10    | 5      |
| H172V         | 5     | 5     |        |
| H172N         | 3     | 3     | 1      |
| H172S         | 3     | 3     | 1      |
| H172K         | 1.5   | 1.5   |        |
| H172R         | 5     | 5     |        |
| H172G         | 1     | 1     |        |
| H172C         | 2     | 2     |        |

|               |        |       |       |
|---------------|--------|-------|-------|
| H172 deletion | 10     |       |       |
| Q189K         | 0.25   | 0.25  | 0.05  |
| Q189F         | 0.0625 | 0.1   |       |
| Q189R         | 0.2    | 0.2   |       |
| Q189H         | 0.125  | 0.125 |       |
| Q189L         | 0.25   | 0.25  |       |
| Q189P         | 0.0625 | 0.1   |       |
| Q189S         | 0.1    | 0.1   |       |
| Q189E         | 0.0625 | 0.1   | 0.01  |
| Q189 deletion | 3      | 3     |       |
| Q192T         | 0.5    | 0.5   | 0.2   |
| Q192K         | 1      | 1     | 0.25  |
| Q192S         | 0.5    | 0.5   | 0.25  |
| Q192L         | 0.3    | 0.3   | 0.15  |
| Q192R         | 1      | 1     |       |
| Q192N         | 0.3    | 0.3   |       |
| Q192A         | 0.5    | 0.5   | 0.175 |
| Q192I         | 0.25   | 0.25  | 0.15  |
| Q192P         | 0.3    | 0.3   | 0.15  |
| Q192G         | 0.75   | 0.75  | 0.25  |
| Q192H         | 0.5    | 0.5   | 0.175 |
| Q192Y         | 10     | 10    |       |
| Q192V         | 0.25   | 0.25  | 0.125 |
| Q192W         | 0.5    | 0.5   | 0.25  |
| Q192E         | 0.5    | 0.5   | 0.2   |
| Q192C         | 0.25   | 0.25  | 0.125 |
| Q192D         | 0.5    | 0.5   |       |
| Q192F         | 0.25   | 0.25  | 0.125 |
| Q192 deletion | 4      |       |       |

|             |     |     |     |
|-------------|-----|-----|-----|
| Q189E/H172Y | 0.4 | 0.4 | 0.1 |
|-------------|-----|-----|-----|
